# Supplementary material for: Transcriptomic analysis of the adaptation to prolonged starvation of the insect-dwelling Trypanosoma cruzi epimastigotes
Source: Front Cell Infect Microbiol. 2023 Apr 6;13:1138456. doi: 10.3389/fcimb.2023.1138456 (PMC10117895; doi:10.3389/fcimb.2023.1138456)
Supplement: Supplementary file 2 [file Table_2.xlsx]

## Sheet: DEGs
		Se vs E		Si vs E		Sf vs E		Sf vs Se		Sf vs Si
Gene ID	Product Description	log2FC	FDR	log2FC	FDR	log2FC	FDR	log2FC	FDR	log2FC	FDR
TcCLB.400945.10	trans-sialidase (pseudogene), putative	1.69318	0.037787	1.39769	0.0918578	1.54071	0.0543337	-0.152474	0.897467	0.143018	0.906911
TcCLB.404975.30	trans-sialidase (pseudogene), putative	1.21961	0.00291618	1.11912	0.00621857	1.54943	6.32779e-05	0.329819	0.505336	0.43031	0.39405
TcCLB.503447.50	trans-sialidase, Group IV, putative	1.19236	1.54882e-05	1.45625	4.13245e-08	2.16349	1.71886e-17	0.97113	0.00014188	0.707241	0.0102516
TcCLB.503501.50	trans-sialidase (pseudogene), putative	1.70183	3.44669e-08	1.65075	7.2785e-08	2.47529	3.21139e-17	0.773466	0.0115458	0.824544	0.00944727
TcCLB.503683.30	RNA-binding protein, putative	1.23507	0.00577247	1.05216	0.0189988	1.65306	8.43439e-05	0.417989	0.46544	0.600901	0.28846
TcCLB.503717.10	trans-sialidase, Group V, putative	1.42734	0.00207691	1.07979	0.0246719	1.24944	0.00729759	-0.177899	0.784067	0.169657	0.808176
TcCLB.503745.30	ascorbate peroxidase	1.86014	4.92271e-202	2.22932	3.70612e-293	2.87339	0	1.01324	3.41555e-66	0.644062	3.72322e-26
TcCLB.503865.12	small nuclear RNA (snRNA) U6	2.62852	0.0098657	3.54664	0.000172438	4.17464	4.84394e-06	1.54612	0.019703	0.628007	0.423291
TcCLB.503885.100	hypothetical protein, conserved	2.66657	0.00329711	3.05632	0.000448003	4.47757	4.71019e-08	1.81101	0.00624926	1.42125	0.0447295
TcCLB.504117.50	hypothetical protein, conserved (pseudogene)	1.03078	3.618e-05	1.18695	9.61896e-07	1.30113	5.31927e-08	0.270348	0.386101	0.114183	0.767858
TcCLB.504153.260	Flagellum attachment zone protein 12	1.26029	6.48486e-70	1.59876	3.38325e-114	2.11972	1.66395e-202	0.859437	7.0002e-35	0.52096	1.34242e-12
TcCLB.504427.244	small nuclear RNA (snRNA) U3	3.65796	2.26682e-08	4.54863	5.96477e-13	4.53775	5.42359e-13	0.8798	0.0746847	-0.010871	0.990894
TcCLB.506203.10	nucleoside transporter 1, putative	1.04798	2.10627e-20	1.01564	2.28208e-19	1.45039	2.72279e-39	0.402405	0.00101017	0.43475	0.00050611
TcCLB.506289.200	hypothetical protein	1.22742	0.0239666	0.882198	0.121274	1.42725	0.00559619	0.19983	0.783449	0.545053	0.406783
TcCLB.506289.210	surface protease GP63, putative	1.45495	0.0464447	1.1483	0.126274	2.03613	0.00223631	0.581182	0.468404	0.887834	0.267478
TcCLB.506345.90	trans-sialidase, Group II, putative	1.21714	4.836e-06	1.03567	0.000116832	1.60059	3.2355e-10	0.383447	0.206355	0.564918	0.0555779
TcCLB.506495.50	hypothetical protein	1.02281	0.000464239	1.35543	1.05017e-06	1.2158	1.47121e-05	0.192995	0.621757	-0.139628	0.748008
TcCLB.506525.120	NLI interacting factor-like phosphatase, putative	2.09938	0.0125593	1.96053	0.0192333	3.55528	1.79056e-06	1.4559	0.0191634	1.59475	0.0139314
TcCLB.506625.190	hypothetical protein, conserved	1.14988	9.53751e-48	1.49099	9.31998e-81	1.64192	3.78039e-98	0.492042	4.2761e-09	0.150932	0.155271
TcCLB.506671.10	Mucin-associated surface protein (MASP), subgroup S020	1.23373	0.0248595	1.12701	0.0400453	1.37319	0.00889274	0.139458	0.856709	0.246182	0.748008
TcCLB.506757.90	trans-sialidase, Group II, putative	1.77616	0.00313911	1.81333	0.00209188	2.47239	1.00667e-05	0.696233	0.286927	0.659066	0.348427
TcCLB.506859.230	hypothetical protein, conserved	1.46358	0.0338163	1.9869	0.0017356	2.53886	2.71738e-05	1.07528	0.0737814	0.551961	0.436163
TcCLB.506925.10	hypothetical protein	1.18101	7.49328e-09	1.2518	5.16247e-10	1.05773	2.06313e-07	-0.123276	0.686902	-0.194066	0.511937
TcCLB.506967.150	trans-sialidase (pseudogene), putative	1.22991	0.0230488	0.937165	0.0941054	1.11568	0.0373129	-0.114233	0.886067	0.178513	0.826429
TcCLB.506967.65	mucin TcMUCII (pseudogene), putative	1.8964	0.0164681	1.95007	0.0113582	1.92395	0.0119513	0.0275419	0.979438	-0.0261257	0.984453
TcCLB.506971.20	surface protease GP63, putative	1.16568	1.01581e-16	1.92531	4.24646e-47	2.42151	2.08734e-75	1.25583	7.79114e-24	0.4962	0.000250946
TcCLB.507047.40	trans-sialidase, Group II, putative	1.78633	0.0311443	1.47547	0.080485	1.6738	0.0391817	-0.112528	0.924323	0.198335	NA
TcCLB.507101.10	amino acid permease, putative	1.59839	0.000806287	1.58904	0.000706985	2.34588	1.82781e-07	0.74749	0.192396	0.756843	0.211465
TcCLB.507143.60	hypothetical protein	1.15932	0.000782831	0.946464	0.00646342	1.32782	6.02216e-05	0.168498	0.744137	0.381357	0.416039
TcCLB.507143.90	hypothetical protein	1.31873	0.00471083	1.43519	0.00153647	1.87454	1.594e-05	0.555816	0.29822	0.439354	0.460794
TcCLB.507465.10	receptor-type adenylate cyclase, putative (fragment)	1.47486	9.59242e-05	1.61628	1.13795e-05	2.09367	4.05562e-09	0.618812	0.125229	0.477394	0.289432
TcCLB.507467.10	receptor-type adenylate cyclase, putative (fragment)	1.25434	3.63901e-08	1.5703	1.1409e-12	1.6706	2.63207e-14	0.416266	0.108906	0.100306	0.780326
TcCLB.507479.20	trans-sialidase, Group II, putative	1.38559	0.0136388	1.1658	0.0402503	1.50006	0.00535409	0.114475	0.8908	0.334257	0.667135
TcCLB.507485.159	tuzin (fragment)	1.73933	0.0141389	-0.0180866	0.984779	1.17398	0.11067	-0.565346	0.512059	1.19207	0.177672
TcCLB.507677.160	hypothetical protein, conserved	1.01015	1.09451e-26	1.12555	1.84333e-33	1.29637	2.4895e-44	0.286215	0.007485	0.170819	0.172436
TcCLB.507699.170	surface protease GP63 (pseudogene), putative	1.25732	0.0055415	0.885472	0.0630878	1.17555	0.00882778	-0.0817718	0.905497	0.29008	0.651087
TcCLB.507707.20	hypothetical protein, conserved	1.04602	1.11061e-06	1.06064	5.57071e-07	1.3445	7.53753e-11	0.298481	0.230647	0.283856	0.287788
TcCLB.507807.30	hypothetical protein	1.32126	2.55762e-05	1.4898	1.08151e-06	1.88659	2.20515e-10	0.565331	0.104111	0.396794	0.318607
TcCLB.507811.100	amino acid permease, putative	2.17948	9.59443e-81	2.57048	1.85966e-114	2.84397	1.34758e-140	0.664495	1.17845e-09	0.273492	0.0323667
TcCLB.507907.10	trans-sialidase, putative	1.24433	0.0209511	1.49117	0.00357219	2.25718	2.43018e-06	1.01286	0.0467207	0.766019	0.175029
TcCLB.507953.60	hypothetical protein	1.58927	1.60374e-05	2.34195	7.64622e-12	2.94309	8.88215e-19	1.35382	2.56541e-06	0.601144	0.0604719
TcCLB.507957.320	Mucin-associated surface protein (MASP), subgroup S068	1.15136	0.0365695	0.0976192	0.892629	1.1343	0.0333386	-0.0170551	0.983209	1.03668	0.100174
TcCLB.507995.20	trans-sialidase, putative	1.44346	0.0013793	1.14766	0.0129499	2.18765	1.53135e-07	0.744187	0.0994924	1.03999	0.0214104
TcCLB.508127.5	hypothetical protein, conserved	1.10616	6.03202e-31	1.40214	2.06229e-50	1.82883	2.39906e-86	0.722672	1.99857e-14	0.426694	2.58607e-05
TcCLB.508165.130	surface protease GP63, putative	1.13121	1.04942e-13	1.73915	1.14616e-32	2.08861	2.71634e-47	0.957392	4.15546e-11	0.349453	0.0402016
TcCLB.508229.60	trans-sialidase, Group VII, putative	1.46279	7.82562e-05	1.18752	0.00159749	1.7366	1.06336e-06	0.273805	0.56025	0.549076	0.209974
TcCLB.508831.66	hypothetical protein, conserved	1.28492	4.93493e-65	1.48432	6.77513e-88	1.76315	1.35753e-124	0.478231	2.62531e-10	0.278835	0.00072025
TcCLB.508923.10	amino acid permease, putative	2.18189	4.79517e-05	2.17373	4.00859e-05	3.06084	2.13235e-09	0.87895	0.178233	0.88711	0.197011
TcCLB.508989.60	chaperone protein DnaJ, putative	1.04097	7.93523e-14	1.2331	1.74225e-19	1.31404	5.4718e-22	0.273069	0.0909885	0.0809386	0.714925
TcCLB.509203.14	hypothetical protein	1.00407	0.0175713	1.14986	0.00475867	1.2035	0.00255673	0.19943	0.745455	0.0536398	0.939555
TcCLB.509205.100	surface protease GP63, putative	1.49503	0.0344368	1.6841	0.0126769	1.6449	0.0144548	0.149867	0.877813	-0.0392033	0.973455
TcCLB.509267.3	receptor-type adenylate cyclase, putative	1.33998	0.0120189	1.16954	0.0295373	0.720268	0.217711	-0.61971	0.318054	-0.44927	0.531517
TcCLB.509449.10	receptor-type adenylate cyclase, putative	1.51419	4.23307e-07	1.64046	2.42842e-08	2.06493	7.25299e-13	0.550744	0.126973	0.424475	0.295048
TcCLB.509699.40	trans-sialidase, Group V, putative	1.3526	0.0136194	1.34497	0.0123895	1.33444	0.0127136	-0.0181606	0.981465	-0.0105361	0.992474
TcCLB.509705.10	cellulosomal scaffoldin anchoring protein, putative	1.23373	6.36128e-05	0.922767	0.00373292	1.25739	3.39885e-05	0.0236663	0.961744	0.334628	0.402982
TcCLB.509707.10	protein associated with differentiation 8, putative	1.03234	9.51882e-17	1.2225	1.4605e-23	1.23085	7.24436e-24	0.198508	0.203456	0.00834521	0.974358
TcCLB.509967.20	mismatch repair protein MSH4, putative	1.06665	8.37745e-44	1.71105	1.55048e-114	1.3937	2.42341e-75	0.327047	8.47621e-05	-0.317353	0.000199951
TcCLB.509977.15	surface protease GP63 (pseudogene), putative	1.47033	0.0336836	1.24807	0.075274	1.18848	0.0894478	-0.281846	0.758057	-0.0595891	0.955666
TcCLB.509979.200	Mucin-associated surface protein (MASP), subgroup S008	1.3171	0.0299196	0.88497	0.167068	1.19619	0.0447221	-0.120914	0.89463	0.31122	0.72318
TcCLB.510013.59	trans-sialidase (pseudogene), putative	1.61661	0.0471201	1.60743	0.0439804	2.15765	0.00417481	0.541035	0.605582	0.550221	0.625213
TcCLB.510021.120	trans-sialidase, Group V, putative	1.14025	0.0188843	1.38159	0.00271358	1.62649	0.000268485	0.486235	0.37299	0.244896	0.712517
TcCLB.510103.24	hypothetical protein, conserved	1.63695	2.41613e-05	1.65233	1.50015e-05	1.95324	1.6446e-07	0.316291	0.565033	0.300918	0.614587
TcCLB.510307.284	trans-sialidase, Group IV, putative	1.92287	0.0137055	1.87875	0.0143764	2.13475	0.00406451	0.211882	0.841988	0.256001	0.813769
TcCLB.510373.90	Mucin-associated surface protein (MASP), subgroup S079	1.17928	0.0408129	0.605049	0.346373	1.39548	0.0100931	0.2162	0.781058	0.790428	0.232944
TcCLB.510441.41	trans-sialidase (pseudogene), putative	1.09932	0.000176487	1.48705	8.44145e-08	1.25772	9.39314e-06	0.158401	0.694022	-0.229326	0.55874
TcCLB.510533.180	microtubule-associated protein 1A/1B, light chain 3, putative	1.69925	1.62723e-05	1.56396	6.9455e-05	1.98879	1.6504e-07	0.289537	0.575871	0.424834	0.408002
TcCLB.510601.10	hypothetical protein, conserved	1.05484	4.43081e-05	1.00418	9.23509e-05	1.41483	8.46194e-09	0.359995	0.214113	0.410657	0.169407
TcCLB.510741.70	STE/STE11 serine/threonine-protein kinase, putative	1.77636	8.93949e-06	1.80279	4.73347e-06	2.65237	3.1413e-12	0.87601	0.0521602	0.849585	0.0746442
TcCLB.510851.40	trans-sialidase (pseudogene), putative	1.89313	0.0387145	1.47627	0.118841	1.89748	0.0319486	0.00435161	0.996871	0.421211	NA
TcCLB.511127.10	RNA-binding protein 5, putative	1.42615	0.00845933	1.08443	0.0537176	0.566801	0.367815	-0.859347	0.153721	-0.517633	0.4804
TcCLB.511127.50	hypothetical protein, conserved	1.01935	1.26669e-25	1.17603	1.54153e-34	1.44167	7.23969e-52	0.422317	3.03788e-05	0.265635	0.0183057
TcCLB.511325.25	amino acid transporter, putative	2.18369	5.95339e-05	2.26559	2.22776e-05	3.0472	4.03472e-09	0.86351	0.192567	0.781616	0.276778
TcCLB.511325.40	amino acid permease, putative	2.6509	8.70403e-07	2.87044	5.87635e-08	3.73574	5.054e-13	1.08484	0.0898302	0.8653	0.223693
TcCLB.511325.50	amino acid permease, putative	2.76588	2.09117e-06	3.05272	9.15067e-08	3.83268	6.83871e-12	1.06679	0.123441	0.779955	0.32191
TcCLB.511413.19	trans-sialidase, putative	1.38168	0.0200706	0.958372	0.126435	1.16176	0.0516773	-0.219914	0.787959	0.20339	0.819035
TcCLB.511585.230	trans-sialidase, Group II, putative	1.36952	0.000685944	1.85747	1.05264e-06	1.93914	2.73036e-07	0.569619	0.188408	0.0816681	0.894609
TcCLB.511621.110	hypothetical protein	1.09184	0.000180651	1.09779	0.000133794	1.36307	1.04292e-06	0.271233	0.490947	0.265275	0.53226
TcCLB.511693.130	hypothetical protein	1.41099	8.14146e-47	1.79142	9.39156e-77	2.64427	2.04143e-170	1.23328	4.26495e-41	0.85285	3.82004e-19
TcCLB.511911.30	mismatch repair protein MSH4 (pseudogene), putative	1.15496	4.74342e-23	1.69729	1.81293e-50	1.53258	6.09148e-41	0.377628	0.00289365	-0.164701	0.293441
TcCLB.404711.10	trans-sialidase (pseudogene), putative	0.8869	0.0173746	1.41489	3.13903e-05	1.79658	4.5867e-08	0.909677	0.00840857	0.381686	0.367763
TcCLB.418405.30	trans-sialidase, putative	1.90128	0.0503576	1.89898	0.0461163	2.79595	0.00135286	0.894661	0.3316	0.89697	NA
TcCLB.477079.10	protein kinase, putative	0.532743	0.228347	1.22661	0.00093692	1.09843	0.0035561	0.565691	0.197671	-0.12818	0.824804
TcCLB.503665.40	surface protease GP63 (pseudogene), putative	0.718411	0.0797292	1.16715	0.00150057	1.82744	1.06617e-07	1.10903	0.00168399	0.660287	0.0925959
TcCLB.503683.11	Double RNA binding domain protein 6A	0.601814	0.0856576	1.14615	0.000187881	1.82017	2.59488e-10	1.21836	2.76674e-05	0.674027	0.0336383
TcCLB.503715.40	STE/STE11 serine/threonine-protein kinase, putative	0.560718	0.0213155	1.30056	1.01819e-09	1.33605	3.37047e-10	0.775335	0.000515547	0.0354899	0.921343
TcCLB.503841.70	aspartate aminotransferase, putative	0.243105	0.10079	1.10161	9.37847e-19	1.1536	1.43638e-20	0.91049	1.79451e-12	0.0519811	0.810728
TcCLB.504035.149	kinesin, putative	0.69671	2.09803e-10	1.0637	5.24927e-24	0.669666	8.59476e-10	-0.0270444	0.885889	-0.394034	0.000957991
TcCLB.504039.250	surface protease GP63 (pseudogene), putative	0.78158	0.571254	4.10149	1.36383e-05	4.89494	9.22496e-08	4.11336	1.0063e-06	0.793448	0.38723
TcCLB.504051.20	ATP-dependent DNA DEAD/DEAH box helicase, putative	0.71458	2.58091e-23	1.3168	4.53854e-79	1.11425	9.69141e-57	0.399674	1.47433e-07	-0.202546	0.0199326
TcCLB.504087.10	Ring finger domain containing protein, putative	0.714427	0.00888685	1.25898	3.73507e-07	1.26598	3.23204e-07	0.551553	0.0444887	0.00699836	0.989478
TcCLB.504149.210	N-acetyltransferase complex ARD1 subunit (pseudogene), putative	0.955122	0.143351	1.24179	0.0407824	0.984664	0.116491	0.029542	0.97604	-0.25713	0.77049
TcCLB.504219.40	trans-sialidase (pseudogene), putative	1.00133	0.0745877	1.19711	0.0245989	1.90852	0.000102336	0.907181	0.0998592	0.711405	0.24371
TcCLB.504341.10	trans-sialidase, Group IV, putative	0.477254	0.22406	1.14253	0.000539255	0.97659	0.00374266	0.499337	0.21195	-0.165941	0.744787
TcCLB.504343.10	trans-sialidase, Group II, putative	0.897197	0.0172681	1.09492	0.00219663	1.87136	1.70664e-08	0.974164	0.00514773	0.776442	0.0386349
TcCLB.504427.20	hypothetical protein, conserved	0.717327	4.50298e-21	1.00894	8.68516e-42	0.943815	1.46558e-36	0.226488	0.00892243	-0.0651264	0.585664
TcCLB.505807.130	Glutamine amidotransferase class-I, putative	0.87089	4.31331e-16	1.06286	5.30982e-24	1.30015	7.98145e-36	0.429259	0.000153301	0.23729	0.0694948
TcCLB.506021.20	trans-sialidase, Group II, putative	0.351908	0.133566	1.15315	2.84999e-09	1.44343	3.05459e-14	1.09152	1.94488e-08	0.290272	0.229786
TcCLB.506129.30	trans-sialidase, Group II, putative	0.846163	0.0511744	1.45741	0.000186894	1.4339	0.000221411	0.587737	0.200496	-0.0235133	0.975387
TcCLB.506129.50	trans-sialidase, Group IV, putative	0.445642	0.225601	1.09551	0.000417972	1.08657	0.000438326	0.640932	0.0679923	-0.00893583	0.989355
TcCLB.506183.90	trans-sialidase (pseudogene), putative	0.69967	0.0148433	1.04653	9.18239e-05	1.17216	7.95128e-06	0.472491	0.131832	0.125626	0.767858
TcCLB.506205.10	hypothetical protein, conserved	0.851471	8.41225e-18	1.03103	3.45357e-26	0.995127	2.2774e-24	0.143657	0.263938	-0.0359062	0.835795
TcCLB.506289.170	surface protease GP63, putative	0.592102	0.093413	1.02266	0.00120858	0.920683	0.00396421	0.328581	0.420208	-0.101981	0.843049
TcCLB.506341.40	hypothetical protein	0.730044	0.122903	1.02558	0.0185838	0.426547	0.391623	-0.303497	0.616105	-0.599038	0.274643
TcCLB.506401.290	hypothetical protein, conserved	0.485841	0.00310784	1.26895	1.92055e-18	1.11935	3.2762e-14	0.633513	3.94317e-05	-0.149595	0.465584
TcCLB.506409.170	trans-sialidase, Group VI, putative	0.363409	0.380318	1.03681	0.00217788	1.20076	0.000265909	0.837347	0.0216798	0.163948	0.75259
TcCLB.506455.30	trans-sialidase, Group II, putative	0.924573	0.0656659	1.08628	0.0233066	1.39131	0.00229345	0.466735	0.418967	0.305026	0.650862
TcCLB.506495.30	retrotransposon hot spot protein (RHS, pseudogene), putative	2.37339	NA	2.72729	0.0481032	2.63641	0.0538035	0.263023	NA	-0.0908788	NA
TcCLB.506529.480	Fusaric acid resistance protein-like, putative	0.957122	2.44546e-08	1.04881	5.09338e-10	0.946231	2.11628e-08	-0.0108907	0.972144	-0.102579	0.7136
TcCLB.506529.595	hypothetical protein	0.991018	2.44546e-08	1.08598	5.05239e-10	0.810559	5.05681e-06	-0.180459	0.455618	-0.275424	0.239834
TcCLB.506677.4	hypothetical protein, conserved	0.917791	0.0310469	1.01262	0.0132645	1.31419	0.000754414	0.396394	0.407269	0.301566	0.57493
TcCLB.506765.49	hypothetical protein	-0.46745	0.584675	1.4221	0.0221926	1.0645	0.0994808	1.53195	0.0324388	-0.3576	0.690551
TcCLB.506767.209	syntaxin binding protein (pseudogene), putative	0.403139	NA	2.59834	0.0230482	1.99243	0.0933527	1.58929	NA	-0.60591	NA
TcCLB.506767.40	Mucin-associated surface protein (MASP), subgroup S104	1.32523	NA	2.94291	0.0211286	2.52635	0.0520746	1.20113	NA	-0.416557	NA
TcCLB.506775.30	tubulin-tyrosine ligase-like protein, putative	0.859268	3.68496e-17	1.13627	6.84907e-30	1.26749	3.32209e-37	0.408221	0.000227125	0.131215	0.368911
TcCLB.506779.188	H/ACA snoRNA, TC6C1H3	2.44165	NA	2.37127	0.0221875	2.2909	0.0264536	-0.150752	NA	-0.0803762	NA
TcCLB.506795.10	RNA-binding protein, putative	-0.555791	NA	2.39926	0.0161157	2.41682	0.01383	2.97261	NA	0.0175612	NA
TcCLB.506847.50	trans-sialidase (pseudogene), putative	0.452398	0.30583	1.07991	0.00356479	0.847051	0.026364	0.394653	0.409622	-0.232861	0.673159
TcCLB.506861.10	ATP-dependent DEAD/H RNA helicase, putative	0.711127	2.90135e-10	1.17526	2.73234e-27	1.49175	7.11018e-44	0.780626	4.33108e-12	0.316496	0.0155508
TcCLB.506925.170	hypothetical protein, conserved	0.84187	0.0399896	1.57587	1.48426e-05	2.2766	5.64128e-11	1.43473	4.58061e-05	0.700729	0.078459
TcCLB.506951.90	trans-sialidase, Group IV, putative	0.984616	0.0170173	1.19837	0.00220366	1.99313	4.38124e-08	1.00851	0.00840604	0.794761	0.0541732
TcCLB.506961.150	trans-sialidase, Group VIII, putative	0.514416	0.253919	1.21482	0.00133089	0.813714	0.0423729	0.299298	0.570012	-0.401102	0.428681
TcCLB.507079.20	dynein heavy chain, cytosolic, putative	0.790169	0.000691536	1.10808	4.15517e-07	1.53711	3.33315e-13	0.746938	0.000569731	0.429031	0.0787046
TcCLB.507089.30	Zinc finger protein, C3H1 type-like	0.59078	0.157129	1.39563	8.11864e-05	1.3027	0.000250555	0.711917	0.0739562	-0.0929313	0.870502
TcCLB.507237.220	Mucin-associated surface protein (MASP), subgroup S053	1.33271	0.141451	1.66661	0.0486662	1.53357	0.0713836	0.200852	0.865227	-0.133049	NA
TcCLB.507275.20	hypothetical protein, conserved	0.862953	0.00435291	1.1235	0.000103952	1.50735	6.94382e-08	0.644392	0.0498542	0.383846	0.324879
TcCLB.507485.150	amastin, putative	-1.04331	NA	2.54922	0.0298594	3.40123	0.00192764	4.44454	NA	0.852004	NA
TcCLB.507527.50	cation transporter, putative	-0.111903	NA	2.66006	0.0198224	2.19714	0.059976	2.30905	NA	-0.462922	NA
TcCLB.507555.50	trans-sialidase, Group VIII, putative	0.768134	0.138607	1.04637	0.0293734	1.4733	0.00107352	0.705171	0.178529	0.426936	0.485635
TcCLB.507617.100	C/D small nucleolar RNA (snoRNA), TB9C2C6	0.786182	0.108363	1.26354	0.00391537	1.75341	2.29481e-05	0.967227	0.0271205	0.48987	0.34323
TcCLB.507673.60	Amastin surface glycoprotein, putative	1.1334	0.103332	1.47524	0.0223778	1.39311	0.0313381	0.259705	0.772045	-0.0821286	0.934029
TcCLB.507699.230	trans-sialidase, putative	3.75758	NA	4.19021	0.0176698	3.761	0.0340089	0.00341647	NA	-0.429216	NA
TcCLB.507711.110	Surface membrane protein	0.930237	7.12623e-06	1.31729	1.7161e-11	1.74413	5.43586e-20	0.813894	1.81547e-05	0.42684	0.0456604
TcCLB.507747.180	trans-sialidase, Group VI, putative	0.778939	0.0622855	1.41543	0.000135213	1.52668	2.94617e-05	0.747738	0.0637323	0.111245	0.848368
TcCLB.507875.220	trans-sialidase, Group II, putative	0.637909	0.357205	1.4214	0.0132912	0.937567	0.127423	0.299658	0.717497	-0.483828	0.528221
TcCLB.507881.110	trans-sialidase (pseudogene), putative	0.974083	0.0350969	1.14827	0.00910201	0.888745	0.0505455	-0.085338	0.904664	-0.259522	0.692549
TcCLB.507907.20	trans-sialidase, Group II, putative	1.42534	0.101048	2.23638	0.00391022	1.47514	0.077607	0.0497976	0.967717	-0.761241	NA
TcCLB.507957.90	mucin TcMUCII, putative	1.32033	0.0971519	1.4953	0.0492619	1.70169	0.0202018	0.381358	0.694022	0.206391	0.850689
TcCLB.508089.20	UDP-glucoronosyl and UDP-glucosyl transferase, putative	0.727496	0.0040976	1.03437	1.28018e-05	0.917118	0.000143328	0.189622	0.560702	-0.117254	0.751794
TcCLB.508109.60	trans-sialidase, Group V, putative	0.658438	0.213853	1.25967	0.00613204	1.14828	0.0130672	0.489844	0.390904	-0.111384	0.880104
TcCLB.508163.330	surface protease GP63, putative	0.508821	0.159606	1.3453	1.26095e-05	1.79571	1.67276e-09	1.28689	4.06754e-05	0.450406	0.247914
TcCLB.508165.310	surface protease GP63, putative	0.98311	2.91495e-06	1.26949	3.70091e-10	1.5418	8.95203e-15	0.558689	0.0112527	0.272311	0.311074
TcCLB.508215.3	CMGC/SRPK protein kinase, putative	0.64248	0.169306	1.33279	0.000958904	1.06347	0.0103556	0.420994	0.420321	-0.269316	0.650862
TcCLB.508285.60	trans-sialidase, Group II, putative	0.654342	0.219773	1.13056	0.0165353	1.34851	0.00302927	0.694164	0.192921	0.21795	0.753566
TcCLB.508323.199	ATP-dependent DEAD/H RNA helicase, putative (fragment)	0.619003	0.000154106	1.16652	2.00779e-14	0.940446	1.19519e-09	0.321444	0.0819544	-0.226078	0.277671
TcCLB.508323.90	hypothetical protein, conserved	0.901456	5.65999e-07	1.2465	5.77266e-13	1.11178	1.77465e-10	0.210319	0.362664	-0.134729	0.617704
TcCLB.508325.230	trans-sialidase, Group IV, putative	0.677543	0.00150478	1.02287	3.03296e-07	1.32632	9.22384e-12	0.648779	0.0017773	0.303455	0.224182
TcCLB.508389.90	surface protease GP63, putative	0.800074	0.00017514	1.26223	3.01592e-10	1.67266	1.07176e-17	0.872584	1.81547e-05	0.410427	0.0826279
TcCLB.508539.150	surface protease GP63 (pseudogene), putative	0.833293	0.0677183	1.49079	0.000211107	1.91027	7.97908e-07	1.07698	0.00669001	0.419479	0.387088
TcCLB.508541.40	surface protease GP63 (pseudogene), putative	0.911809	1.26756e-06	2.08542	8.09797e-35	2.33055	1.45211e-43	1.41874	6.38606e-19	0.245132	0.225025
TcCLB.508607.50	trans-sialidase, Group II, putative	0.688245	0.00286038	1.07555	5.04771e-07	1.02747	1.88898e-06	0.339228	0.189011	-0.0480748	0.895231
TcCLB.509205.110	elongation factor G2-like protein, putative	0.937383	1.05588e-09	1.40369	1.10135e-21	1.44684	6.8009e-23	0.509452	0.00115688	0.0431463	0.864386
TcCLB.509265.120	trans-sialidase, putative	2.26223	NA	2.51125	0.0305195	3.17891	0.00368286	0.916673	NA	0.667652	NA
TcCLB.509767.40	pre-mRNA splicing factor, putative	0.747508	1.21643e-23	1.09057	6.41674e-51	1.31525	4.09232e-74	0.56774	2.31517e-14	0.224677	0.00853136
TcCLB.509805.50	AN1-like zinc finger, putative	0.958259	4.23429e-22	1.13912	1.61664e-31	1.40713	4.74079e-48	0.448869	1.43874e-05	0.268008	0.0208796
TcCLB.510005.20	trans-sialidase, Group II, putative	0.336917	0.314996	1.01237	0.000227825	1.05579	0.000101981	0.718868	0.016739	0.0434161	0.926991
TcCLB.510015.10	hypothetical protein	0.493952	0.441092	1.19983	0.0216439	1.84903	0.000129408	1.35508	0.00794464	0.6492	0.274391
TcCLB.510023.10	hypothetical protein, conserved (pseudogene)	2.32945	NA	2.62806	0.0180915	2.58657	0.0189078	0.257119	NA	-0.0414851	NA
TcCLB.510105.65	small nuclear RNA (snRNA) U4	0.919077	0.212368	2.13762	0.000522683	2.41466	5.83669e-05	1.49559	0.0174474	0.277041	0.75259
TcCLB.510127.70	leucine-rich repeat protein 1 (LRRP1), putative	0.884624	2.60842e-12	1.2827	6.84627e-26	1.18776	4.81322e-22	0.303138	0.0317828	-0.0949416	0.61885
TcCLB.510205.40	trans-sialidase, Group V, putative	0.810058	4.14071e-05	1.11109	3.52983e-09	1.37551	8.93343e-14	0.565455	0.00446474	0.264419	0.274391
TcCLB.510241.20	hypothetical protein, conserved	0.791823	7.54711e-23	1.18588	2.05085e-51	1.15736	5.39286e-49	0.365542	2.24538e-05	-0.0285153	0.842965
TcCLB.510243.80	hypothetical protein, conserved	0.822088	1.42048e-25	1.1329	2.25881e-49	1.52835	1.61332e-90	0.706261	1.55013e-20	0.395449	1.12533e-06
TcCLB.510275.370	Mucin-associated surface protein (MASP), subgroup S136	1.16493	0.124939	1.52668	0.0299032	1.71627	0.0116583	0.551343	0.503989	0.189594	0.851825
TcCLB.510281.20	surface protease GP63, putative	0.880397	7.52753e-10	1.58874	2.71422e-32	1.79837	2.46158e-41	0.917974	4.65284e-12	0.209628	0.218438
TcCLB.510309.70	hypothetical protein, conserved	-0.809823	NA	2.1825	0.0477862	2.66595	0.0106567	3.47578	NA	0.483457	NA
TcCLB.510323.110	NLI interacting factor-like phosphatase, putative	1.16	0.0550827	2.05367	0.000130363	1.55201	0.00529434	0.392017	0.585167	-0.501654	0.471987
TcCLB.510407.9	Serine/threonine-protein kinase NEK11, putative	0.93064	0.00054536	1.14225	1.01257e-05	1.58833	2.00773e-10	0.657685	0.0184565	0.446075	0.159486
TcCLB.510409.10	STE/STE11 serine/threonine-protein kinase, putative	0.834686	0.208844	1.50324	0.00869238	2.67912	2.32578e-07	1.84444	0.000246378	1.17588	0.0263965
TcCLB.510491.60	trans-sialidase, Group IV, putative	0.712186	0.000195877	1.05702	5.50552e-09	1.32623	8.0333e-14	0.61404	0.00145957	0.269201	0.256852
TcCLB.510533.90	hypothetical protein, conserved	0.99839	2.4402e-21	1.24651	1.34423e-33	1.03427	5.40696e-23	0.0358839	0.839615	-0.212235	0.107497
TcCLB.510565.70	STE/STE11 serine/threonine-protein kinase, putative	0.917582	1.4092e-39	1.23043	1.37717e-71	1.63891	1.90449e-127	0.721324	1.28165e-24	0.408478	6.72752e-08
TcCLB.510877.140	hypothetical protein, conserved	0.762229	5.24678e-25	1.02209	2.5602e-45	1.19483	7.23569e-62	0.432599	1.51183e-08	0.17274	0.0568261
TcCLB.511127.80	hypothetical protein, conserved	0.736912	1.04563e-27	1.07007	3.72652e-59	1.4064	1.22432e-102	0.669485	7.72421e-24	0.336328	3.01361e-06
TcCLB.511173.190	trans-sialidase (pseudogene), putative	0.751773	0.128691	1.23702	0.00505118	1.27091	0.00368572	0.519138	0.320999	0.0338941	0.963134
TcCLB.511191.39	small nuclear RNA (snRNA) U2	0.757867	0.0710891	1.40269	0.000148011	2.96533	1.13501e-18	2.20747	8.41e-12	1.56264	1.72291e-06
TcCLB.511303.40	carnitine O-acetyltransferase, putative	0.842432	1.94577e-20	1.01398	6.30829e-30	1.21897	4.5653e-43	0.376542	6.26438e-05	0.204991	0.0572397
TcCLB.511311.20	trans-sialidase, Group II, putative	0.68254	0.164369	1.14	0.00958454	1.07331	0.0145011	0.390769	0.492048	-0.0666948	0.92773
TcCLB.511431.60	hypothetical protein, conserved	0.108015	0.878607	1.17309	0.013418	1.0657	0.0261134	0.957681	0.0724629	-0.107398	0.887216
TcCLB.511437.10	surface protease GP63, putative	0.452518	0.40696	1.50238	0.000376174	0.476717	0.353787	0.0241982	0.97604	-1.02566	0.0332898
TcCLB.511445.120	hypothetical protein, conserved	0.699663	3.22852e-15	1.29121	6.91252e-52	1.65422	1.46456e-85	0.95456	2.7343e-29	0.363012	0.000114996
TcCLB.511569.30	trans-sialidase (pseudogene), putative	1.18353	NA	2.32844	0.0306003	1.43459	0.221175	0.251053	NA	-0.893856	NA
TcCLB.511593.91	trans-sialidase, putative (fragment)	0.700132	0.359898	1.29136	0.0492688	1.46676	0.0207288	0.76663	0.301969	0.175397	0.85764
TcCLB.511625.130	trans-sialidase, Group V, putative	0.734483	0.124993	1.28483	0.00261101	1.52374	0.00022778	0.78926	0.0940304	0.238915	0.70554
TcCLB.511691.20	serine sulfhydrylase	0.458024	0.237081	1.30732	3.92136e-05	1.916	2.45481e-10	1.45797	2.43671e-06	0.608681	0.0831275
TcCLB.511709.19	phosphatidylinositol 3-kinase catalytic subunit, putative (fragment)	0.97457	9.84007e-09	1.27342	7.86114e-15	0.991021	4.08788e-09	0.0164507	0.955261	-0.282401	0.175986
TcCLB.511711.40	hypothetical protein, conserved	0.98716	1.75647e-23	1.14609	4.32282e-32	1.47893	1.58258e-53	0.49177	6.49254e-07	0.332837	0.00183858
TcCLB.401569.10	trans-sialidase, putative	0.589257	0.0260691	0.813357	0.0010377	1.05157	1.1339e-05	0.462308	0.100858	0.238208	0.488355
TcCLB.410943.10	hypothetical protein, conserved	0.797171	4.89367e-06	0.819214	1.86715e-06	1.43289	1.66222e-18	0.635717	0.000236337	0.613674	0.000620217
TcCLB.421173.4	trans-sialidase, putative (fragment)	0.0616	NA	1.32803	0.192407	2.21806	0.0139864	2.15646	NA	0.890033	NA
TcCLB.427247.10	CMGC/DYRK protein kinase, putative	0.708737	2.75619e-09	0.855811	1.98157e-13	1.17412	7.71819e-25	0.465388	0.000178959	0.318314	0.0204127
TcCLB.437805.9	trans-sialidase (pseudogene), putative	0.698925	0.463871	0.726856	0.426904	1.53752	0.0497364	0.838591	0.374707	0.81066	0.423291
TcCLB.438923.10	hypothetical protein (fragment)	0.83657	2.60059e-05	0.957023	7.3325e-07	1.02631	8.86445e-08	0.189745	0.457708	0.0692919	0.829454
TcCLB.439803.9	trans-sialidase (pseudogene), putative	0.778257	0.015923	0.748008	0.0187939	1.01815	0.000761728	0.239893	0.559073	0.270141	0.530714
TcCLB.447847.10	trans-sialidase (pseudogene), putative	-0.0658656	0.938132	-0.0795932	0.916561	1.22679	0.0227195	1.29265	0.0288908	1.30638	0.035213
TcCLB.447925.10	cystathionine beta-synthase, putative (fragment)	0.0358076	0.954783	0.91483	0.0294888	1.78592	1.89899e-06	1.75011	8.22768e-06	0.871091	0.0350249
TcCLB.464807.10	serine/threonine protein kinase, putative	0.668194	1.21015e-08	0.726706	3.07903e-10	1.05582	5.88768e-21	0.387628	0.00192778	0.329115	0.0138663
TcCLB.480785.10	serine/threonine kinase, putative	-0.606529	NA	1.06416	0.424711	3.06433	0.00383208	3.67086	NA	2.00017	NA
TcCLB.503441.5	trans-sialidase, putative (fragment)	0.471758	NA	1.44587	0.10553	1.79493	0.0330218	1.32317	NA	0.349061	NA
TcCLB.503551.20	hypothetical protein, conserved	0.664202	0.0200667	0.81678	0.00268365	1.11563	1.84522e-05	0.451424	0.151779	0.298846	0.412342
TcCLB.503613.10	Calcium/calmodulin-dependent protein kinase kinase, putative	0.57213	0.0594232	0.811832	0.00405887	1.19157	9.02728e-06	0.619437	0.0439204	0.379735	0.290994
TcCLB.503659.30	trans-sialidase, putative	1.3495	0.142457	0.681392	0.509405	2.02582	0.0135134	0.676321	0.49481	1.34443	NA
TcCLB.503779.30	hypothetical protein, conserved	0.169461	0.201589	0.549951	7.85591e-07	1.16135	2.46569e-28	0.991894	2.33942e-20	0.611404	6.27376e-08
TcCLB.503783.34	mucin-associated surface protein (MASP, pseudogene), putative	1.19958	0.133727	1.37937	0.0706408	1.84765	0.00952987	0.648071	0.454494	0.468283	0.637337
TcCLB.503783.50	surface protease GP63 (pseudogene), putative	1.06217	NA	1.31769	0.156423	1.83945	0.0312856	0.777277	NA	0.521759	NA
TcCLB.503903.79	hypothetical protein	0.5303	1.79495e-08	0.682719	7.86232e-14	1.0072	1.52883e-29	0.476898	3.81387e-07	0.324479	0.00137908
TcCLB.503957.10	trans-sialidase, putative	0.433112	0.000880415	0.840415	2.78129e-12	1.07593	9.20443e-20	0.642822	2.10324e-07	0.235518	0.117508
TcCLB.504029.101	hypothetical protein, conserved	0.763525	7.23028e-22	0.949975	2.82339e-34	1.10986	1.64545e-46	0.346331	2.63186e-05	0.159881	0.101755
TcCLB.504051.40	hypothetical protein, conserved	0.754226	1.38534e-22	0.969762	1.02054e-37	1.12732	9.90251e-51	0.373092	3.38552e-06	0.157556	0.102453
TcCLB.504055.130	trans-sialidase (pseudogene), putative	0.485378	0.634829	1.31675	0.10569	1.98022	0.00758369	1.49484	0.0607564	0.663468	NA
TcCLB.504075.6	kinetoplastid-specific dual specificity phosphatase, putative	0.672136	0.0682493	0.805339	0.0212872	1.04168	0.00182453	0.369548	0.373667	0.236345	0.62724
TcCLB.504099.50	trans-sialidase, Group II, putative	0.386778	1.08459e-09	0.847557	4.60017e-45	1.16262	7.14342e-85	0.775844	7.60008e-38	0.315064	1.72149e-06
TcCLB.504101.40	trans-sialidase (pseudogene), putative	0.909293	0.246112	1.16807	0.109612	1.52813	0.0256159	0.618841	0.467395	0.360061	0.720326
TcCLB.504125.100	sugar transporter, putative, frameshift	0.534633	0.0324579	0.599054	0.0128382	1.09365	1.13843e-06	0.559014	0.0326285	0.494594	0.0784263
TcCLB.504125.80	hypothetical protein, conserved	0.805349	5.21924e-20	0.965089	6.65174e-29	1.30074	1.93571e-52	0.49539	3.34975e-08	0.33565	0.000504538
TcCLB.504147.110	asparaginase, putative	0.746257	0.000725871	0.936405	9.23438e-06	1.1654	1.58484e-08	0.419139	0.0774427	0.228991	0.421217
TcCLB.504153.50	ribosomal RNA large subunit alpha, 5' & 3' partial	0.466633	0.303059	0.800733	0.0495427	1.01356	0.00897411	0.546923	0.258837	0.212823	0.732733
TcCLB.504213.100	hypothetical protein, conserved	0.771242	5.28483e-07	0.888037	3.01762e-09	1.00684	1.15199e-11	0.235603	0.195793	0.118808	0.595978
TcCLB.504229.110	amino acid permease 24, putative	0.613611	1.96416e-08	0.732129	7.05533e-12	1.17979	6.24721e-30	0.566184	3.25986e-07	0.447666	0.000132943
TcCLB.504239.434	trans-sialidase, putative (fragment)	0.488032	0.439744	0.707694	0.215639	1.08192	0.037979	0.593888	0.34632	0.374225	0.612586
TcCLB.504427.230	trans-sialidase, Group VIII, putative	0.739547	0.00511788	0.953046	0.000142078	1.2483	2.47311e-07	0.508752	0.0602451	0.295254	0.356209
TcCLB.504643.30	ubiquitin-conjugating enzyme E2, putative	0.893704	7.37038e-20	0.918167	4.0249e-21	1.21593	7.87356e-37	0.322229	0.003185	0.297767	0.010074
TcCLB.504769.100	trans-sialidase, Group II, putative	0.500698	0.0780118	0.986662	8.06231e-05	1.02409	3.86745e-05	0.523391	0.0620316	0.0374265	0.92978
TcCLB.505025.130	Mucin-associated surface protein (MASP), subgroup S105	1.14013	0.109934	1.19476	0.0849	1.70179	0.0081917	0.561653	0.495201	0.507022	0.574314
TcCLB.505155.4	trans-sialidase, putative (fragment)	1.85238	NA	1.95735	0.0888951	2.27498	0.037979	0.422602	NA	0.31763	NA
TcCLB.505945.90	folate/pteridine transporter, putative	0.83531	1.29833e-05	0.881164	2.79622e-06	1.22235	2.2031e-11	0.387036	0.0842141	0.341181	0.160685
TcCLB.506147.20	hypothetical protein	0.1749	0.54281	0.595784	0.00912003	1.08029	3.31766e-07	0.905393	5.06051e-05	0.484509	0.0536132
TcCLB.506285.30	trans-sialidase (pseudogene), putative	-0.435433	0.411605	0.393027	0.416244	1.09526	0.0061574	1.53069	0.000414092	0.702234	0.146635
TcCLB.506285.40	Mucin-associated surface protein (MASP) (pseudogene)	0.395885	0.525491	0.781972	0.14222	1.58339	0.000660693	1.1875	0.017359	0.801417	0.145568
TcCLB.506287.90	chaperone protein DnaJ, putative	0.14885	0.236543	0.224465	0.0518502	1.02364	8.715e-25	0.874786	1.25224e-17	0.799171	2.51947e-14
TcCLB.506289.70	hypothetical protein, conserved	0.609062	4.22037e-13	0.804113	8.63331e-23	1.0459	2.45927e-38	0.436838	2.33966e-07	0.241788	0.0106384
TcCLB.506341.50	trans-sialidase, Group VIII, putative	1.80844	NA	1.30726	0.240882	2.43695	0.0113969	0.628515	NA	1.12969	NA
TcCLB.506357.21	H/ACA snoRNA, TC10C4H2	-0.589738	0.56772	0.0670319	0.950047	1.67403	0.0219557	2.26377	0.0056896	1.607	NA
TcCLB.506369.40	hypothetical protein, conserved	0.55192	6.42727e-12	0.761417	1.46283e-22	1.10767	1.27332e-47	0.55575	1.57065e-12	0.346254	3.75283e-05
TcCLB.506375.35	hypothetical protein	0.443552	0.506192	0.659475	0.275408	1.09592	0.0436495	0.652366	0.320444	0.436443	0.564727
TcCLB.506399.60	hypothetical protein, conserved	0.634995	7.09275e-13	0.748775	7.04545e-18	1.04469	2.10326e-34	0.409696	8.085e-06	0.295916	0.00283455
TcCLB.506407.10	lysosomal alpha-mannosidase precursor, putative	0.648337	2.75839e-21	0.902391	3.07811e-41	1.02889	1.58258e-53	0.380557	1.24302e-07	0.126502	0.163179
TcCLB.506409.100	mucin TcMUCII, putative	1.88682	NA	0.33351	0.821396	2.39942	0.0216634	0.512595	NA	2.06591	NA
TcCLB.506411.25	hypothetical protein, conserved (pseudogene)	0.45492	0.501287	0.826278	0.159752	1.11977	0.0406575	0.664854	0.306751	0.293496	0.714622
TcCLB.506481.30	hypothetical protein, conserved	0.578957	2.44823e-09	0.793479	3.4332e-17	1.01357	9.54175e-28	0.434615	1.52776e-05	0.220094	0.0587025
TcCLB.506499.10	hypothetical protein, conserved (pseudogene)	2.28519	NA	1.69614	0.271526	2.94902	0.0272889	0.663834	NA	1.25289	NA
TcCLB.506501.100	hypothetical protein	0.108604	0.920494	0.681228	0.412653	1.56916	0.0238359	1.46055	0.0558614	0.887932	NA
TcCLB.506505.30	hypothetical protein, conserved	0.90914	9.72285e-29	0.991305	1.85561e-34	1.07348	2.00824e-40	0.164338	0.105132	0.0821722	0.512696
TcCLB.506543.113	hypothetical protein, conserved	1.09126	0.182181	1.24685	0.108687	1.46016	0.0493796	0.368902	0.705002	0.213308	NA
TcCLB.506551.10	protein associated with differentiation 8, putative	0.866063	3.59042e-18	0.992833	6.70881e-24	1.23493	7.11751e-37	0.368862	0.000853253	0.242093	0.0514052
TcCLB.506599.330	Mucin-associated surface protein (MASP), subgroup S001	1.77902	NA	1.76444	0.0724378	2.46148	0.00655967	0.682462	NA	0.697039	NA
TcCLB.506623.20	trans-sialidase (pseudogene), putative	0.863641	0.0432528	0.792154	0.0623117	1.06855	0.00761635	0.204913	0.720117	0.2764	0.637837
TcCLB.506625.230	hypothetical protein, conserved	0.452465	NA	1.06196	0.312272	1.96115	0.0319707	1.50868	NA	0.899183	NA
TcCLB.506633.90	folate/pteridine transporter, putative	0.691582	4.51823e-10	0.728132	3.004e-11	1.18586	8.0289e-29	0.494276	2.1367e-05	0.457726	0.000150901
TcCLB.506661.10	fatty acid elongase, putative	0.558803	0.00697133	0.870994	6.7604e-06	1.00882	1.11087e-07	0.450019	0.0399834	0.137828	0.645981
TcCLB.506661.40	zinc finger domain, LSD1 subclass, putative	0.665283	1.20433e-08	0.803875	1.58507e-12	1.125	4.71652e-24	0.459713	0.000118935	0.321122	0.0140876
TcCLB.506717.130	trans-sialidase (pseudogene), putative	0.183153	0.441618	0.735329	8.3398e-05	1.2007	1.36452e-11	1.01755	3.52255e-08	0.465373	0.0253397
TcCLB.506717.80	trans-sialidase, Group VIII, putative	0.420909	0.239457	0.688229	0.0318646	1.16738	7.57292e-05	0.746472	0.0213427	0.479152	0.194387
TcCLB.506737.90	trans-sialidase, Group V, putative	-0.294568	0.661685	0.588924	0.282991	1.1854	0.0127561	1.47997	0.00442603	0.596474	0.32191
TcCLB.506755.200	hypothetical protein, conserved	-0.184783	0.0797292	-0.0462488	0.707555	1.04322	1.0706e-32	1.22801	2.5957e-43	1.08947	2.62209e-33
TcCLB.506759.190	surface protease GP63 (pseudogene), putative	0.544678	0.404136	0.647585	0.290397	1.2093	0.0244351	0.664617	0.297385	0.56171	0.420243
TcCLB.506759.90	trans-sialidase (pseudogene), putative	0.889765	0.115932	0.834972	0.136477	1.10823	0.0349897	0.218462	0.776718	0.273255	0.729768
TcCLB.506763.210	hypothetical protein	1.15261	0.209285	1.0814	0.233963	1.84263	0.0218814	0.690021	0.470967	0.76123	NA
TcCLB.506859.204	hypothetical protein, conserved	3.14915	NA	2.76056	NA	5.35982	0.00192356	2.21067	NA	2.59926	NA
TcCLB.506885.180	hypothetical protein, conserved	0.453116	1.77185e-06	0.605319	3.9432e-11	1.0975	2.24282e-35	0.644381	2.7477e-12	0.492177	3.67119e-07
TcCLB.506885.354	hypothetical protein, conserved	0.916209	4.65133e-07	0.82033	6.36746e-06	1.15354	5.10206e-11	0.237333	0.288194	0.333212	0.129418
TcCLB.506887.10	trans-sialidase, putative	0.734959	0.120085	0.566041	0.244739	1.06026	0.0135246	0.325306	0.562459	0.494224	0.374995
TcCLB.506895.5	hypothetical protein	0.733663	0.100228	0.445247	0.352784	1.116	0.00566881	0.382335	0.45401	0.670751	0.173068
TcCLB.506945.210	Zinc finger CCCH domain-containing protein 47	0.447043	7.40838e-09	0.667611	3.71555e-19	1.08043	1.43068e-49	0.63339	6.20108e-17	0.412821	2.89578e-07
TcCLB.506973.140	hypothetical protein	3.92327	NA	4.26208	NA	4.55014	0.0081917	0.626867	NA	0.288056	NA
TcCLB.507035.80	trans-sialidase (pseudogene), putative	0.364566	0.383743	0.914338	0.00814085	1.19839	0.000284461	0.833825	0.021386	0.284053	0.545209
TcCLB.507091.160	trans-sialidase (pseudogene), putative	0.587759	0.197611	0.713394	0.097655	1.43975	0.000153529	0.851995	0.0411536	0.726359	0.106887
TcCLB.507091.60	trans-sialidase, Group V, putative	0.541825	0.230336	0.90173	0.0246943	1.13977	0.00300262	0.597941	0.181626	0.238036	0.673266
TcCLB.507099.60	hypothetical protein, conserved	0.435075	0.00114402	0.584052	4.946e-06	1.23084	3.20585e-24	0.795764	3.67911e-10	0.646787	1.07536e-06
TcCLB.507121.11	trans-sialidase, putative (fragment)	0.670696	0.281658	1.08525	0.0510489	1.24692	0.0200314	0.576222	0.382052	0.161669	0.848554
TcCLB.507163.70	trans-sialidase, Group V, putative	0.97816	0.019056	0.923528	0.0254811	1.33111	0.00058772	0.352947	0.478081	0.407579	0.432253
TcCLB.507211.20	NEK family Serine/threonine-protein kinase, putative	0.403655	0.458252	0.573027	0.24699	1.29907	0.00224498	0.895414	0.0585619	0.726042	0.160939
TcCLB.507389.10	Flagellum attachment zone protein 14	0.706786	1.44567e-05	0.824448	1.89317e-07	1.07285	3.83543e-12	0.366068	0.0376587	0.248407	0.218072
TcCLB.507395.30	hypothetical protein	0.752551	6.3413e-05	0.606081	0.00151048	1.02229	1.24159e-08	0.269741	0.215669	0.416212	0.0482235
TcCLB.507479.70	trans-sialidase, Group IV, putative	0.505763	0.139334	0.749892	0.0164238	1.04984	0.000385096	0.54408	0.107995	0.299952	0.456927
TcCLB.507485.120	tuzin	0.568713	0.115665	0.707784	0.0377178	1.52641	4.82035e-07	0.957698	0.0028335	0.818627	0.0163534
TcCLB.507485.30	Amastin surface glycoprotein, putative	0.782439	0.0235127	0.785086	0.0202727	1.00358	0.00193893	0.221143	0.620779	0.218496	0.651087
TcCLB.507511.50	hypothetical protein	0.0163971	0.986716	0.25789	0.765197	1.42341	0.0279979	1.40701	0.0491641	1.16552	0.128595
TcCLB.507611.170	trans-sialidase, Group II, putative	0.701394	0.174407	0.773818	0.11926	1.01231	0.0303596	0.310914	0.619692	0.23849	0.733272
TcCLB.507617.160	C/D small nucleolar RNA (snoRNA), TB9C2C3	1.00213	0.253163	0.659837	0.476413	2.19127	0.00266717	1.18914	0.141519	1.53143	0.063794
TcCLB.507629.39	hypothetical protein, conserved (fragment)	0.54673	9.08064e-08	0.94698	3.07814e-22	1.41609	1.76493e-49	0.869355	1.37189e-18	0.469105	1.12707e-05
TcCLB.507639.30	universal minicircle sequence binding protein 1	0.480638	1.00148e-07	0.8429	1.5064e-22	1.78102	4.38281e-100	1.30038	7.79381e-53	0.938117	8.48425e-27
TcCLB.507711.100	Surface membrane protein	0.895593	3.74464e-05	0.889625	3.38161e-05	1.60395	1.31129e-15	0.70836	0.00063924	0.714328	0.000853894
TcCLB.507747.130	trans-sialidase (pseudogene), putative	0.506222	0.0701994	0.734211	0.00443996	1.13698	2.96109e-06	0.630756	0.0187256	0.402767	0.189152
TcCLB.507831.30	hypothetical protein, conserved	0.646618	0.278519	1.01136	0.0588994	1.67541	0.000583323	1.02879	0.0549709	0.664051	0.276988
TcCLB.507835.10	trans-sialidase (pseudogene), putative	1.63697	0.0759413	1.29934	0.171691	1.89795	0.0282537	0.260982	0.828161	0.598606	NA
TcCLB.507873.30	Double RNA binding domain protein 7	0.443821	1.40235e-06	0.728967	9.547e-17	1.07664	5.16103e-36	0.632815	1.93928e-12	0.347669	0.000388368
TcCLB.507879.10	trans-sialidase, Group II, putative	0.367707	0.511705	0.715318	0.139393	1.53462	0.00028658	1.16692	0.010843	0.819304	0.104758
TcCLB.507923.20	U3 small nuclear ribonucleoprotein (snRNP), putative	0.278559	0.0287641	0.597393	1.83452e-07	1.04919	1.27851e-21	0.770632	1.21618e-11	0.451799	0.000226081
TcCLB.507953.100	trans-sialidase, Group V, putative	0.592449	0.0311025	0.940645	0.000174358	1.01201	4.52919e-05	0.419557	0.148594	0.0713615	0.861782
TcCLB.507957.140	trans-sialidase (pseudogene), putative	2.81916	NA	2.93962	NA	3.1358	0.0296853	0.316638	NA	0.196174	NA
TcCLB.507957.220	Mucin-associated surface protein (MASP), subgroup S078	0.540252	0.351585	0.911239	0.075927	1.20339	0.0128209	0.66314	0.252225	0.292154	0.687508
TcCLB.507957.260	surface protease GP63 (pseudogene), putative	0.466924	0.471502	0.968426	0.0752362	1.46135	0.00349081	0.994429	0.0694368	0.492928	0.44741
TcCLB.507959.180	surface protease GP63 (pseudogene), putative	0.316619	0.79564	1.2195	0.194055	1.75853	0.0404662	1.44191	0.133996	0.539032	NA
TcCLB.507981.10	trans-sialidase (pseudogene), putative	0.849867	0.0201357	0.925067	0.00885313	1.40803	2.10591e-05	0.558168	0.145132	0.482968	0.247249
TcCLB.507997.14	trans-sialidase, putative (fragment)	0.667483	0.132929	0.847247	0.041883	1.5722	2.73561e-05	0.904719	0.0250866	0.724956	0.0985484
TcCLB.508041.10	SKP1-like protein	0.254657	0.522828	0.966548	0.00254102	1.22381	7.37669e-05	0.969156	0.00443896	0.257265	0.590029
TcCLB.508121.30	trans-sialidase (pseudogene), putative	2.4178	NA	1.88715	0.1084	2.97901	0.00446962	0.561214	NA	1.09186	NA
TcCLB.508137.40	hypothetical protein, conserved	0.739332	0.0891	0.831802	0.0466753	1.06045	0.00767843	0.321123	0.558745	0.228652	0.716686
TcCLB.508157.10	serine-alanine-and proline-rich protein (pseudogene), putative	1.33584	0.102893	0.55858	0.559362	1.52595	0.0478296	0.190106	0.861434	0.967366	NA
TcCLB.508211.10	oxysterol-binding protein, putative	0.530593	9.22154e-05	0.631009	1.57003e-06	1.16032	1.58404e-20	0.629728	1.5421e-06	0.529311	0.000115973
TcCLB.508239.20	hypothetical protein, conserved	0.707208	5.50664e-19	0.952464	1.92025e-34	1.2349	9.12163e-58	0.527691	8.3143e-11	0.282435	0.00169991
TcCLB.508265.70	hypothetical protein, conserved	0.43716	0.00262927	0.313062	0.0364617	1.02654	6.6175e-15	0.589381	2.67252e-05	0.713479	5.21093e-07
TcCLB.508277.350	cation transporter, putative	0.477748	9.7161e-11	0.723328	3.22909e-24	1.21189	5.66973e-68	0.734145	3.22617e-25	0.488564	4.25015e-11
TcCLB.508307.134	hypothetical protein, conserved	0.612915	1.29957e-07	0.901421	5.99305e-16	1.29636	1.25837e-32	0.683443	1.72213e-09	0.394937	0.00148773
TcCLB.508343.10	trans-sialidase, putative	0.633299	0.00187809	0.872929	5.77802e-06	1.09762	5.26141e-09	0.464324	0.0266905	0.224693	0.380351
TcCLB.508383.40	C/D small nucleolar RNA (snoRNA), TB10C3C4	1.0501	0.250489	1.57929	0.0539612	1.70669	0.0320424	0.656592	0.495746	0.127403	NA
TcCLB.508383.50	C/D small nucleolar RNA (snoRNA), TB10C3C5	1.17486	0.0742637	0.677089	0.348622	1.86088	0.00149197	0.686013	0.308428	1.18379	0.0725554
TcCLB.508537.5	tyrosine aminotransferase, putative (fragment)	0.973996	0.00333046	0.554606	0.120588	1.27992	4.36677e-05	0.305927	0.459033	0.725318	0.0492262
TcCLB.508541.110	Mucin-associated surface protein (MASP), subgroup S068	0.0841757	0.909119	0.159432	0.806747	1.09412	0.0248026	1.00994	0.0620676	0.934685	0.104919
TcCLB.508563.20	trans-sialidase, Group II, putative	0.587634	0.0046668	0.950209	7.79867e-07	1.23235	4.71693e-11	0.644717	0.00128721	0.282142	0.246824
TcCLB.508647.30	hypothetical protein, conserved	0.614111	1.05431e-07	0.892773	8.57718e-16	1.14919	7.22328e-26	0.535079	4.26169e-06	0.256417	0.0580199
TcCLB.508653.20	ribosomal RNA small subunit, 5' partial	0.692165	0.369551	1.17165	0.0906273	1.47061	0.0249222	0.778441	0.349313	0.298957	0.776235
TcCLB.508675.9	CMGC/DYRK protein kinase, putative (fragment)	0.401055	0.145277	0.910403	0.000126947	1.09835	2.16015e-06	0.697292	0.00539388	0.187944	0.578967
TcCLB.508687.30	Mucin-associated surface protein (MASP) (pseudogene)	0.841539	0.353898	0.127269	0.905181	1.84089	0.0134058	0.999347	0.239608	1.71362	NA
TcCLB.508775.20	retrotransposon hot spot protein (RHS, pseudogene), putative	3.9149	NA	3.80969	NA	4.75596	0.0181156	0.841059	NA	0.946275	NA
TcCLB.508807.5	glycosylphosphatidylinositol-specific phospholipase C, putative	0.463895	0.00351848	0.732848	7.24954e-07	1.23038	2.51486e-18	0.76648	1.12949e-07	0.497527	0.00130419
TcCLB.508977.80	trans-sialidase, Group V, putative	0.445637	0.136451	0.873546	0.000912251	1.04287	4.88288e-05	0.597235	0.0379563	0.169325	0.666413
TcCLB.509007.40	hypothetical protein, conserved	0.0270597	0.95986	0.703681	0.0586056	1.06951	0.00193674	1.04245	0.00511913	0.365826	0.431857
TcCLB.509007.80	hypothetical protein, conserved	0.574466	1.07537e-06	0.762444	1.77026e-11	1.1918	2.06382e-27	0.617335	6.40505e-08	0.429357	0.000423704
TcCLB.509097.20	trans-sialidase, Group V, putative	0.362379	0.551205	0.912565	0.0667226	1.0767	0.0243393	0.714319	0.197702	0.164132	0.823504
TcCLB.509099.40	hypothetical protein, conserved	0.830631	8.64993e-07	0.88816	8.16345e-08	1.28059	1.1378e-15	0.449962	0.00893712	0.392433	0.0329756
TcCLB.509123.10	Trypomastigote, Alanine, Serine and Valine rich protein (TASV), subfamily C	0.0126561	0.984058	-0.132815	0.818156	1.28975	0.00160076	1.2771	0.00371372	1.42257	0.00182265
TcCLB.509167.140	RNA-binding protein 42 (RNA-binding motif protein 42), putative	0.560304	3.89562e-13	0.838855	6.97381e-29	1.02317	6.81782e-43	0.462868	7.22842e-09	0.184318	0.0531471
TcCLB.509197.10	cation transporter, putative	0.470636	0.265697	0.492591	0.228873	1.08645	0.00236107	0.61581	0.142871	0.593855	0.184286
TcCLB.509341.20	hypothetical protein, conserved	0.636757	9.29252e-10	0.834007	1.5908e-16	1.08258	1.59756e-27	0.445824	3.42483e-05	0.248573	0.0426725
TcCLB.509441.10	hypothetical protein, conserved	0.297833	0.364619	0.610441	0.030737	1.16893	5.61857e-06	0.871095	0.00164033	0.558487	0.0695001
TcCLB.509581.50	hypothetical protein	-0.480328	NA	2.15044	0.0783772	3.3866	0.00208292	3.86693	NA	1.23616	NA
TcCLB.509595.20	hypothetical protein, conserved	-0.0156971	0.986469	0.874787	0.187344	2.5045	4.37718e-06	2.5202	1.15943e-05	1.62971	0.00464802
TcCLB.509669.170	Nodulin-like, putative	0.757618	2.87351e-10	0.833494	1.73183e-12	1.06104	7.12857e-20	0.303418	0.0225961	0.227542	0.125746
TcCLB.509699.110	Mucin-associated surface protein (MASP), subgroup S002	0.386183	0.699266	0.200318	0.842144	1.85081	0.0104829	1.46462	0.0657808	1.65049	0.046931
TcCLB.509699.220	trans-sialidase (pseudogene), putative	0.696943	0.103426	0.659208	0.119837	1.25094	0.000925492	0.554002	0.216411	0.591737	0.207561
TcCLB.509707.20	hypothetical protein, conserved	0.809156	2.3441e-08	0.782291	5.5423e-08	1.00633	9.2138e-13	0.197169	0.273004	0.224034	0.226637
TcCLB.509739.10	trans-sialidase, Group II, putative	0.76658	0.0206979	0.765099	0.0184781	1.35229	6.49378e-06	0.58571	0.0940304	0.587192	0.111184
TcCLB.509765.129	trans-sialidase, putative (fragment)	0.516947	0.355449	0.700319	0.172787	1.05288	0.0254108	0.535937	0.346178	0.352565	0.592053
TcCLB.509767.140	hypothetical protein	0.43484	8.20677e-06	0.583735	5.35179e-10	1.01569	4.74426e-29	0.580852	1.07049e-09	0.431956	1.85057e-05
TcCLB.509805.210	hypothetical protein, conserved	0.575439	0.004774	0.968264	2.5358e-07	1.1907	9.77594e-11	0.615263	0.00178197	0.222439	0.373893
TcCLB.509815.90	retrotransposon hot spot protein (RHS, pseudogene), putative	0.700791	0.00177632	0.924304	1.3642e-05	1.26494	7.00877e-10	0.564152	0.0107832	0.340639	0.181434
TcCLB.509819.20	hypothetical protein, conserved	0.629162	9.13991e-20	0.945603	5.70709e-45	1.24157	1.22766e-77	0.61241	1.77107e-19	0.295969	6.45495e-05
TcCLB.510013.200	serine-alanine-and proline-rich protein, putative	2.83003	NA	4.53871	NA	3.87684	0.0376557	1.04681	NA	-0.661871	NA
TcCLB.510025.50	trans-sialidase, Group V, putative	0.275728	0.250199	0.746932	0.000220506	1.01071	2.22432e-07	0.734983	0.000458007	0.263779	0.320382
TcCLB.510049.10	trans-sialidase, putative	0.0820024	0.902329	0.0325045	0.958582	1.07196	0.013389	0.989962	0.0378989	1.03946	0.0372584
TcCLB.510077.20	trans-sialidase (pseudogene), putative	1.68761	NA	1.53602	0.201869	2.2947	0.0345639	0.607097	NA	0.758684	NA
TcCLB.510125.20	trans-sialidase, Group VIII, putative	0.602277	0.316364	0.511187	0.395739	1.23561	0.0147837	0.633334	0.299413	0.724424	0.252886
TcCLB.510205.10	trans-sialidase, putative	2.06362	NA	2.39699	0.0740217	3.28153	0.00796801	1.21791	NA	0.884534	NA
TcCLB.510209.9	trans-sialidase, putative	0.755967	NA	1.60121	0.0961892	1.92579	0.0347218	1.16982	NA	0.32458	NA
TcCLB.510241.110	Pescadillo N-terminus/BRCA1 C Terminus (BRCT) domain containing protein, putative	0.269227	0.000212781	0.67085	2.30722e-23	1.03624	2.8387e-55	0.767016	8.50687e-30	0.365393	6.408e-07
TcCLB.510275.160	trans-sialidase (pseudogene), putative	0.120169	0.690015	0.798497	0.000250046	1.22965	2.90699e-09	1.10948	2.49786e-07	0.431155	0.0806874
TcCLB.510275.255	hypothetical protein	0.0481872	0.952574	0.387095	0.556606	1.16532	0.0292549	1.11714	0.0594861	0.778229	0.238441
TcCLB.510281.10	hypothetical protein	0.0443535	0.958738	0.324315	0.653626	1.43145	0.00945429	1.3871	0.0214502	1.10714	0.0865461
TcCLB.510295.59	hypothetical protein, conserved	-0.271306	0.528729	0.451785	0.225807	1.31895	2.97689e-05	1.59026	1.9112e-06	0.867169	0.0173465
TcCLB.510297.10	hypothetical protein, conserved	-0.446108	0.183494	0.324433	0.310917	1.7386	2.72545e-12	2.18471	1.9659e-16	1.41417	6.91911e-08
TcCLB.510307.10	surface protease GP63, putative	0.735748	0.0177935	0.940599	0.00135056	1.81638	2.20708e-11	1.08063	0.000135843	0.875777	0.0035393
TcCLB.510369.10	Mucin-associated surface protein (MASP), subgroup S061	0.896772	0.0679216	0.898096	0.0623234	1.30951	0.00339308	0.412735	0.455471	0.411411	0.487955
TcCLB.510371.80	hypothetical protein	0.238612	0.765608	0.94771	0.125577	1.1742	0.0451775	0.935587	0.162316	0.226489	0.796233
TcCLB.510403.30	trans-sialidase, Group II, putative	0.307073	0.525491	0.0731204	0.889134	1.16978	0.00160805	0.862707	0.0355885	1.09666	0.00896666
TcCLB.510427.10	hypothetical protein, conserved	-0.259504	0.798338	0.045993	0.962917	1.45638	0.0349521	1.71588	0.0245141	1.41039	NA
TcCLB.510431.250	phosphoribosylpyrophosphate synthetase, putative	0.396804	2.17333e-07	0.613403	7.69323e-17	1.36554	6.6069e-82	0.968731	8.16351e-41	0.752132	6.28674e-24
TcCLB.510451.10	trans-sialidase (pseudogene), putative	0.736136	0.00143219	0.886785	6.38553e-05	1.19543	2.30314e-08	0.459289	0.0564471	0.30864	0.2648
TcCLB.510553.20	trans-sialidase (pseudogene), putative	1.36785	0.0546574	1.23489	0.0821822	1.59736	0.0168857	0.229509	0.815105	0.362474	0.711624
TcCLB.510561.40	mucin TcMUCII, putative	0.782974	NA	1.49173	0.116591	1.80022	0.0454411	1.01724	NA	0.30849	NA
TcCLB.510717.10	Trypomastigote, Alanine, Serine and Valine rich protein (TASV), subfamily A (fragment)	0.361541	0.0354695	0.509079	0.00150023	1.09099	1.74759e-13	0.729446	2.34304e-06	0.581908	0.000332338
TcCLB.510717.20	Trypomastigote, Alanine, Serine and Valine rich protein (TASV), subfamily A	0.383226	0.00142722	0.511089	8.20678e-06	1.1397	3.09317e-26	0.75647	7.99399e-12	0.628607	5.02451e-08
TcCLB.510737.30	mitochondrial carrier protein, putative	0.558135	9.42496e-05	0.773746	1.59851e-08	1.08404	4.21491e-16	0.525904	0.000300611	0.310294	0.0610539
TcCLB.510739.30	C/D small nucleolar RNA (snoRNA), TB9C3C2	-0.657689	0.57997	0.667539	0.502173	2.73653	0.000248122	3.39422	7.81391e-05	2.06899	NA
TcCLB.510769.170	trans-sialidase (pseudogene), putative	0.463738	0.210897	0.523889	0.13937	1.38292	5.35199e-06	0.919184	0.00487666	0.859033	0.012383
TcCLB.510847.10	trans-sialidase, Group VIII, putative	0.495264	0.222689	0.766895	0.0361278	1.28695	0.000124861	0.791686	0.0312444	0.520055	0.211548
TcCLB.510961.30	Mucin-associated surface protein (MASP), subgroup S013	1.5475	0.0969059	1.10248	0.262432	2.10616	0.0129121	0.558663	0.591186	1.00368	NA
TcCLB.510971.30	trans-sialidase, Group VIII, putative	2.01211	NA	2.25276	0.124083	3.27757	0.0143344	1.26546	NA	1.02481	NA
TcCLB.511127.180	hypothetical protein, conserved	0.658368	4.99332e-14	0.695989	8.82998e-16	1.00023	4.04209e-32	0.341864	0.000203685	0.304243	0.00167311
TcCLB.511141.30	protein kinase, putative	0.869628	2.22819e-05	0.904469	7.0794e-06	1.27584	5.30684e-11	0.406209	0.0723196	0.371367	0.126831
TcCLB.511173.470	trans-sialidase, Group V, putative	0.620259	0.23665	0.462323	0.392008	1.01627	0.0280152	0.396013	0.50014	0.55395	0.351174
TcCLB.511213.30	surface protease GP63 (pseudogene), putative	2.83372	NA	2.85964	NA	4.98253	0.00689422	2.14881	NA	2.12289	NA
TcCLB.511313.10	hypothetical protein, conserved	0.354555	0.122024	0.885817	8.22638e-06	1.0995	1.46068e-08	0.744949	0.000363581	0.213687	0.442707
TcCLB.511349.100	trans-sialidase, Group II, putative	0.511055	0.00203125	0.650185	4.12181e-05	1.14152	2.89237e-14	0.630467	7.17917e-05	0.491337	0.00377796
TcCLB.511349.110	retrotransposon hot spot protein (RHS, pseudogene), putative	0.858763	0.12461	0.610481	0.296838	1.15043	0.0249737	0.291662	0.676296	0.539945	0.417757
TcCLB.511369.10	elongation factor 1-alpha, putative	0.74293	0.128133	0.368613	0.492955	1.30942	0.002461	0.566494	0.287075	0.940811	0.0648854
TcCLB.511401.90	trans-sialidase, Group V, putative	0.54254	0.159162	0.910064	0.00829851	1.43756	7.87719e-06	0.895018	0.00970428	0.527493	0.183332
TcCLB.511411.16	Spinocerebellar ataxia type 10 protein domain containing protein, putative	0.566146	1.83754e-20	0.920029	2.04367e-54	1.28839	2.06391e-107	0.722244	1.5999e-34	0.368361	5.08015e-09
TcCLB.511411.30	arginine permease	0.627803	0.00695326	0.887988	5.92422e-05	1.52376	5.85306e-13	0.895954	0.000113466	0.635769	0.0125077
TcCLB.511431.20	hypothetical protein, conserved	0.578448	2.72415e-06	0.768563	9.9228e-11	1.06117	6.10395e-20	0.482726	0.000111567	0.292611	0.037431
TcCLB.511431.90	conserved protein, unknown function	1.26233	0.0867671	0.927978	0.219352	1.58059	0.0209028	0.318255	0.758065	0.652611	0.498244
TcCLB.511433.10	hypothetical protein, conserved	0.846564	0.0328311	0.926471	0.0156388	1.04067	0.00512095	0.194102	0.730905	0.114194	0.858429
TcCLB.511469.60	transporter, putative	0.507463	5.38418e-05	0.696513	7.44104e-09	1.05204	2.17135e-19	0.544573	1.33203e-05	0.355523	0.00987252
TcCLB.511567.20	retrotransposon hot spot protein (RHS, pseudogene), putative	2.42153	NA	2.19593	NA	3.66891	0.044164	1.24739	NA	1.47299	NA
TcCLB.511577.120	hypothetical protein, conserved	0.525709	0.000108228	0.72517	2.47575e-08	1.03459	2.84569e-16	0.508881	0.00021639	0.30942	0.0467131
TcCLB.511585.10	hypothetical protein, conserved	0.634408	2.46801e-17	0.965476	4.87811e-40	1.38468	1.86213e-82	0.750275	2.66665e-24	0.419207	1.15187e-07
TcCLB.511587.90	trans-sialidase, Group VIII, putative	1.30972	0.0759152	0.947435	0.218719	1.40654	0.0454336	0.0968167	0.929847	0.459102	0.641448
TcCLB.511599.10	trans-sialidase, putative	0.956318	NA	0.303845	0.819786	2.42922	0.0104655	1.4729	NA	2.12537	NA
TcCLB.511603.200	mucin TcMUCII, putative	-0.190206	0.863985	1.1731	0.130993	1.60406	0.0260879	1.79426	0.0242832	0.430953	NA
TcCLB.511607.60	trans-sialidase (pseudogene), putative	0.268006	0.580769	0.851568	0.0295518	1.30368	0.000356498	1.03567	0.00972721	0.452107	0.362408
TcCLB.511735.34	Eukaryotic protein of unknown function (DUF872), putative	0.508688	0.0292648	0.280231	0.265773	1.01527	1.12681e-06	0.506583	0.0317576	0.735039	0.00158214
TcCLB.511801.50	tRNA threonylcarbamoyl adenosine modification protein, Sua5/YciO/YrdC/YwlC family, putative	0.4935	5.88892e-12	0.582672	1.19417e-16	1.18608	1.3103e-68	0.69258	5.77832e-24	0.603407	1.28639e-17
TcCLB.511875.9	Mucin-associated surface protein (MASP), subgroup S127	0.732732	0.38901	0.881949	0.268202	1.67578	0.0155506	0.943046	0.237695	0.793829	0.363879
TcCLB.511877.10	Trypomastigote, Alanine, Serine and Valine rich protein (TASV), subfamily B	0.786386	NA	3.15587	NA	4.23269	0.024913	3.4463	NA	1.07681	NA
TcCLB.506799.110	hypothetical protein	-0.0495101	0.948573	-0.381195	0.556606	0.841696	0.110024	0.891206	0.133612	1.22289	0.0420031
TcCLB.508123.10	hypothetical protein, conserved	-0.47739	0.5055	-1.96165	0.00245736	-0.120047	0.873573	0.357343	0.682686	1.8416	0.0124458
TcCLB.508607.70	trans-sialidase (pseudogene), putative	-0.679448	0.502519	-1.23096	0.191645	0.793254	0.360739	1.4727	0.119408	2.02421	0.0379874
TcCLB.511173.24	Mucin-associated surface protein (MASP), subgroup S043	0.052926	0.952473	-0.820603	0.260701	0.696893	0.281117	0.643967	0.402518	1.5175	0.0392496
TcCLB.511871.120	Mucin-associated surface protein (MASP)	0.0425512	0.941057	-0.205025	0.680141	0.981311	0.0078983	0.93876	0.0202265	1.18634	0.00421326
TcCLB.506147.14	C/D small nucleolar RNA (snoRNA), TB9C2C1	-0.349153	0.572285	-0.278583	0.64936	0.786146	0.106585	1.1353	0.0320935	1.06473	0.0565231
TcCLB.506357.19	C/D small nucleolar RNA (snoRNA), TB10C4C3	-1.42123	0.0329957	-0.864051	0.19547	0.388536	0.558329	1.80977	0.00714394	1.25259	0.0814151
TcCLB.506825.10	Double RNA binding domain protein 12	-0.704458	0.292164	-0.51324	0.443938	0.630237	0.281975	1.3347	0.0336407	1.14348	0.0869837
TcCLB.508781.15	H/ACA snoRNA, TC6C1H3	-0.894318	0.254187	-0.513881	0.523852	0.633928	0.375365	1.52825	0.0431566	1.14781	0.163966
TcCLB.510741.202	C/D small nucleolar RNA (snoRNA), TB9C4C2	-1.23173	0.0440701	-0.339685	0.600514	0.154916	0.812159	1.38665	0.0300855	0.494601	0.517118
TcCLB.511213.60	Mucin-associated surface protein (MASP), subgroup S129	-1.18426	0.00645453	-0.260083	0.59147	0.075117	0.883849	1.25937	0.00579172	0.3352	0.569436
TcCLB.511603.160	Mucin-associated surface protein (MASP), subgroup S082	-1.02492	0.095125	-0.25081	0.708406	0.297191	0.629421	1.32211	0.0344187	0.548001	0.461618
TcCLB.430737.20	hypothetical protein, conserved (fragment)	-1.58675	3.02611e-06	-1.50002	7.45034e-06	-1.7183	5.4388e-07	-0.131553	0.833846	-0.218278	0.721696
TcCLB.458015.4	hypothetical protein, conserved	-1.39764	1.21643e-23	-1.75262	1.9248e-35	-2.00065	1.5161e-42	-0.603016	0.000516879	-0.248029	0.267527
TcCLB.503639.10	inositol-3-phosphate synthase, putative	-1.03004	2.94763e-18	-1.10099	8.27236e-21	-1.00202	2.39933e-17	0.0280154	0.899469	0.0989671	0.620959
TcCLB.503677.10	phosphomannose isomerase, putative	-1.87737	1.07818e-75	-1.95742	3.04564e-82	-1.62443	2.66445e-57	0.252943	0.05155	0.332989	0.0101669
TcCLB.503697.140	hypothetical protein	-1.13438	6.11598e-21	-1.52137	1.23548e-36	-1.69427	4.66055e-44	-0.559892	5.18101e-05	-0.172901	0.352492
TcCLB.503831.40	mitochondrial DNA primase, putative	-1.33933	1.83072e-55	-1.67602	3.30546e-84	-2.08244	6.71741e-120	-0.743112	4.25584e-14	-0.406421	0.00020169
TcCLB.503841.10	proteasome activator protein pa26, putative	-1.12437	5.49123e-20	-1.16926	1.00709e-21	-1.20408	5.85379e-23	-0.0797023	0.689106	-0.0348196	0.880977
TcCLB.503893.30	hypothetical protein, conserved	-1.02865	3.94157e-20	-1.07289	6.66109e-22	-0.93267	9.77599e-17	0.095979	0.58565	0.140224	0.420795
TcCLB.503989.10	zinc finger protein 2, putative	-1.27964	0.000863785	-0.595057	0.1493	-1.57105	2.17056e-05	-0.29141	0.597849	-0.975995	0.0284535
TcCLB.503991.39	2,4-dihydroxyhept-2-ene-1,7-dioic acid aldolase, putative	-1.25301	1.50512e-48	-1.51037	2.82852e-69	-1.03408	1.45027e-33	0.218936	0.0418604	0.47629	1.77746e-06
TcCLB.504051.49	Mitochondrial large ribosomal subunit mL96, putative	-1.0169	5.20595e-25	-1.15379	6.85522e-32	-1.26618	5.79957e-37	-0.249278	0.0482934	-0.112385	0.485654
TcCLB.504089.70	hypothetical protein, conserved	-1.13255	5.20666e-18	-1.208	1.60205e-20	-1.55074	1.30414e-32	-0.418191	0.00686086	-0.342743	0.0415104
TcCLB.504427.64	hypothetical protein, conserved	-1.13404	1.02242e-05	-0.97177	0.000151652	-1.37188	3.47642e-08	-0.237846	0.507895	-0.400115	0.24253
TcCLB.504769.80	Nucleoporin NUP92	-1.10026	3.21503e-37	-1.10909	4.81096e-38	-1.03591	4.4699e-33	0.0643521	0.647292	0.0731861	0.617649
TcCLB.505989.110	amidinotransferase, putative	-1.1192	1.06131e-60	-1.32999	2.09767e-85	-1.44457	8.18186e-100	-0.325367	2.44394e-05	-0.11458	0.246277
TcCLB.506213.50	prostaglandin F synthase (pseudogene), putative	-1.49433	8.22032e-119	-1.64767	1.7914e-144	-1.78116	6.48428e-168	-0.286829	9.93661e-05	-0.133483	0.133115
TcCLB.506221.110	chromosomal passenger complex 2	-1.23735	1.97749e-30	-1.96274	9.67425e-72	-2.22407	1.46111e-86	-0.98672	6.38413e-16	-0.261332	0.0989659
TcCLB.506223.40	PSP1 C-terminal conserved region, putative	-1.21038	1.21643e-23	-1.64365	1.06783e-41	-1.71405	8.41845e-44	-0.503673	0.000492975	-0.0703994	0.758845
TcCLB.506239.10	hypothetical protein, conserved	-1.4655	3.85214e-62	-1.79568	2.44663e-89	-2.25779	6.1656e-125	-0.792292	7.0937e-14	-0.462105	7.9774e-05
TcCLB.506287.209	DNA ligase, putative	-1.07109	3.92059e-30	-1.30784	1.49921e-43	-1.2083	1.16193e-36	-0.137212	0.321024	0.099539	0.537226
TcCLB.506289.30	hypothetical protein, conserved	-1.15792	9.66871e-20	-1.01773	9.72277e-16	-1.10628	4.51275e-18	0.0516371	0.821881	-0.0885498	0.692549
TcCLB.506357.40	Elongation factor Tu, mitochondrial, putative	-1.21352	1.04932e-41	-1.26393	2.46079e-45	-1.50666	3.08383e-63	-0.293137	0.00609511	-0.242728	0.036089
TcCLB.506465.14	hypothetical protein, conserved	-1.06267	4.23271e-23	-0.921107	5.88417e-18	-0.939917	2.51486e-18	0.12275	0.443077	-0.0188098	0.92962
TcCLB.506503.80	kinesin, putative	-1.17463	7.31155e-50	-1.46439	1.70419e-76	-1.95471	8.72224e-129	-0.780079	2.51056e-19	-0.490321	1.62502e-07
TcCLB.506533.142	mucin TcSMUGL, putative	-1.32095	6.69406e-22	-1.26939	1.53102e-20	-1.52425	2.08621e-28	-0.203298	0.295538	-0.25486	0.191947
TcCLB.506567.110	hypothetical protein, conserved	-1.05423	5.50751e-32	-1.41885	3.44367e-55	-1.3495	6.48487e-49	-0.295271	0.00867714	0.0693497	0.677696
TcCLB.506717.200	hypothetical protein, conserved	-1.08663	2.69583e-10	-1.06642	4.25846e-10	-1.12029	8.70164e-11	-0.0336558	0.920196	-0.0538667	0.870164
TcCLB.506735.10	mitochondrial processing peptidase alpha subunit, putative	-1.07247	5.61194e-56	-1.29	3.53315e-80	-1.51743	1.77492e-107	-0.444964	5.14533e-09	-0.22743	0.00909589
TcCLB.506775.90	PIF1 helicase-like protein, putative	-1.18225	2.57193e-63	-1.58839	2.64158e-109	-1.94053	3.42332e-149	-0.758274	7.82498e-21	-0.35214	0.000120764
TcCLB.506893.100	UMP-CMP kinase, mitochondrial, putative	-1.8027	1.40095e-112	-2.41125	2.73434e-194	-3.13709	1.11834e-297	-1.33439	2.77511e-50	-0.725846	5.64006e-14
TcCLB.506925.120	eukaryotic translation initiation factor 5A	-1.11915	3.19935e-07	-0.993845	5.11555e-06	-1.02836	1.75878e-06	0.0907837	0.800658	-0.0345173	0.93124
TcCLB.506925.300	cyclophilin a, putative	-1.37197	2.59321e-54	-1.55162	1.11265e-69	-1.41893	1.66642e-58	-0.0469664	0.751732	0.132692	0.300725
TcCLB.506933.60	mitochondrial RNA binding protein, putative	-1.05641	4.29269e-28	-0.841578	2.32395e-18	-0.717099	1.08735e-13	0.339312	0.00195461	0.124479	0.381489
TcCLB.506937.10	cytosolic malate dehydrogenase, putative	-1.07218	6.28254e-47	-1.24249	6.20218e-63	-1.47142	4.02889e-87	-0.399241	1.38163e-06	-0.228926	0.0141827
TcCLB.507035.75	retrotransposon hot spot protein (RHS, pseudogene), putative	-1.94557	0.035679	-1.10212	0.230914	-1.70182	0.0591879	0.243751	0.877628	-0.599699	NA
TcCLB.507083.40	hypothetical protein, conserved	-1.09878	6.01979e-47	-1.30883	3.58851e-65	-1.43661	6.67144e-75	-0.337834	0.00024257	-0.127779	0.282576
TcCLB.507105.50	hypothetical protein	-1.21599	9.95295e-43	-1.31007	1.11336e-49	-1.47168	3.11615e-62	-0.255692	0.0167439	-0.161611	0.194042
TcCLB.507283.39	trans-sialidase (pseudogene), putative	-1.26167	0.000203832	-0.727571	0.0309983	-0.399006	0.256914	0.862668	0.027185	0.328565	0.496881
TcCLB.507483.50	calmodulin	-1.10669	0.00391487	-0.951965	0.0128758	-1.13747	0.00214627	-0.0307796	0.963028	-0.185505	0.762661
TcCLB.507537.10	cysteine peptidase, clan CA, family C1 (pseudogene), putative	-1.00967	6.74637e-09	-0.529378	0.0035447	-1.01741	2.57778e-09	-0.00774378	0.979656	-0.488036	0.0177995
TcCLB.507639.10	poly-zinc finger protein 2, putative	-1.01383	4.03727e-19	-0.942516	6.35112e-17	-1.09889	1.71623e-21	-0.0850555	0.658425	-0.156372	0.380546
TcCLB.507641.240	hypothetical protein	-1.27872	0.00470949	-0.425011	0.38092	-0.280047	0.565607	0.998672	0.0498316	0.144964	0.842333
TcCLB.507709.120	hypothetical protein, conserved	-1.24717	1.65958e-44	-1.25959	1.23812e-45	-1.61326	1.1319e-73	-0.366088	0.000327218	-0.353665	0.000821388
TcCLB.507809.39	hypothetical protein, conserved	-1.26705	2.14139e-34	-1.61197	1.02806e-53	-1.56497	1.06218e-49	-0.297922	0.0238777	0.0470016	0.816599
TcCLB.507817.18	histone H3, putative	-1.36629	4.41249e-05	-1.52965	3.89346e-06	-1.00595	0.00238293	0.360336	0.446904	0.523702	0.267469
TcCLB.507837.20	protein kinase, putative	-1.23981	8.03968e-65	-1.48749	2.95294e-93	-1.97317	8.36491e-162	-0.733369	1.36959e-21	-0.485688	2.89844e-09
TcCLB.507929.20	co-chaperone GrpE, putative	-1.33524	1.83352e-14	-1.20162	5.06643e-12	-1.19021	5.96583e-12	0.145026	0.576092	0.0114087	0.975919
TcCLB.507993.330	mevalonate-diphosphate decarboxylase, putative	-1.13097	9.17146e-43	-1.32947	3.78421e-58	-1.46427	5.32197e-68	-0.333302	0.000760908	-0.134803	0.285381
TcCLB.508209.100	10 kDa heat shock protein, putative	-1.39037	0.000117668	-1.06226	0.00354353	-0.606969	0.109908	0.783403	0.0580682	0.455291	0.35709
TcCLB.508265.10	glutathione-S-transferase/glutaredoxin, putative	-1.21259	1.08609e-44	-1.41287	2.11841e-60	-1.6361	1.65043e-79	-0.423514	1.51283e-05	-0.223233	0.0492262
TcCLB.508321.21	histone H2A, putative	-1.16659	8.24905e-26	-1.48599	1.05531e-41	-1.60584	2.15739e-48	-0.439245	0.000477634	-0.119845	0.49031
TcCLB.508647.280	malic enzyme	-1.0769	1.90108e-20	-0.825095	1.61298e-12	-0.570525	1.3777e-06	0.506377	7.20544e-05	0.25457	0.0897077
TcCLB.508675.29	calpain-like cysteine peptidase, putative	-1.4796	2.54489e-48	-1.57964	2.73089e-55	-1.32376	2.77141e-39	0.155837	0.2567	0.25588	0.0479524
TcCLB.508719.30	hypothetical protein, conserved	-1.42532	1.85474e-38	-1.60808	5.09901e-49	-1.59097	4.02709e-48	-0.165652	0.270212	0.0171152	0.935036
TcCLB.509011.40	calreticulin, putative	-1.01712	1.59452e-58	-0.851035	8.58735e-42	-0.83599	6.88967e-40	0.181134	0.0200481	0.0150444	0.902731
TcCLB.509069.30	tubulin binding cofactor A-like protein, putative	-1.03496	3.07314e-13	-1.01948	5.22117e-13	-1.19962	7.25105e-17	-0.164655	0.441795	-0.180137	0.420946
TcCLB.509147.50	mucin TcSMUGL, putative	-1.2804	0.0020951	-1.28779	0.00169451	-1.71705	5.38459e-05	-0.436651	0.488481	-0.429262	0.528869
TcCLB.509157.70	hypothetical protein, conserved	-1.02224	6.68751e-08	-1.12824	1.81452e-09	-1.07077	1.45824e-08	-0.0485269	0.889828	0.0574769	0.872832
TcCLB.509197.39	cation transporter, putative	-1.03515	4.27683e-40	-1.23528	9.61719e-57	-1.47246	5.17786e-79	-0.437309	4.74109e-07	-0.237176	0.0166935
TcCLB.509201.15	ribosomal protein S29, putative	-1.49585	1.5107e-09	-2.01335	8.97008e-16	-2.01494	2.34502e-15	-0.519089	0.121919	-0.00159703	0.998975
TcCLB.509245.29	hypothetical protein, conserved	-1.05772	5.22507e-14	-1.1369	3.69704e-16	-1.29332	2.23824e-20	-0.235593	0.210166	-0.156413	0.474725
TcCLB.509445.10	tryparedoxin peroxidase, putative	-1.69415	0.0304991	-2.36441	0.00137477	-2.50774	0.000538439	-0.81359	0.406438	-0.143323	0.911893
TcCLB.509551.30	mitochondrial phosphate transporter, putative	-1.01071	1.24978e-42	-1.07203	5.30701e-48	-1.42558	2.46885e-82	-0.414868	4.86485e-07	-0.353548	4.54827e-05
TcCLB.509551.70	Co-chaperone protein P23	-1.09483	6.71098e-49	-0.913101	1.22971e-34	-0.525286	3.38114e-12	0.569548	7.15541e-13	0.387815	4.19882e-06
TcCLB.509965.290	p22 protein precursor, putative	-1.11532	4.65029e-49	-1.17466	2.32761e-54	-1.095	6.37864e-47	0.0203209	0.887879	0.0796647	0.52305
TcCLB.510101.140	pyruvate phosphate dikinase, putative	-1.2385	1.97546e-63	-1.35618	1.99745e-76	-1.67572	1.74335e-116	-0.437218	4.5184e-08	-0.319541	0.000183984
TcCLB.510101.40	60S ribosomal protein L28, putative	-1.36558	0.00349793	-1.6548	0.000253422	-1.75434	7.99363e-05	-0.388758	0.544147	-0.0995401	0.902389
TcCLB.510259.50	rotamase, putative	-1.37654	4.64339e-43	-1.35773	3.54159e-42	-1.66821	6.40088e-62	-0.291667	0.0174932	-0.310479	0.0141827
TcCLB.510317.30	poly(A) polymerase, putative	-1.09963	7.96192e-23	-1.53691	1.81115e-42	-1.67472	3.66996e-48	-0.575091	1.12719e-05	-0.137814	0.460013
TcCLB.510347.29	hypothetical protein, conserved	-1.02202	5.88701e-18	-1.11221	3.6539e-21	-1.06489	2.43244e-19	-0.0428677	0.840857	0.0473152	0.830478
TcCLB.510509.50	mitochondrial RNA binding protein, putative	-1.17407	8.59514e-20	-1.13385	1.0258e-18	-1.40032	1.26826e-27	-0.226253	0.188512	-0.266473	0.127485
TcCLB.510525.80	histone H2A, putative	-1.01473	5.0387e-05	-1.61015	2.26597e-11	-1.45749	1.31785e-09	-0.442752	0.147452	0.152666	0.711624
TcCLB.510525.90	histone H2A, putative	-1.1377	4.80439e-29	-1.48014	2.4514e-47	-1.51252	6.72805e-48	-0.374815	0.00258812	-0.0323741	0.875886
TcCLB.510535.100	cysteine peptidase C (CPC), putative	-1.01399	5.02253e-34	-1.34794	4.9284e-60	-1.84781	4.75147e-112	-0.833823	3.64698e-22	-0.499873	6.80709e-08
TcCLB.510743.70	lactoylglutathione lyase-like protein, putative	-1.31166	6.48486e-70	-1.21365	1.48162e-60	-1.01298	1.61847e-42	0.298684	0.000524401	0.200668	0.0364888
TcCLB.510773.20	Vacuolar proton pyrophosphatase 1, putative	-1.01049	1.21648e-37	-1.11516	5.91444e-46	-1.62837	1.90694e-96	-0.617885	1.6163e-13	-0.51321	4.04936e-09
TcCLB.510911.40	hypothetical protein, conserved	-1.21505	0.000281143	-0.323098	0.378944	-0.799724	0.0163698	0.415326	0.362047	-0.476626	0.28039
TcCLB.511001.240	proteasome activator protein pa26, putative	-1.09563	0.0340353	-1.2849	0.010607	-0.57022	0.278225	0.525411	0.429428	0.714677	0.286797
TcCLB.511039.10	kinetoplast DNA-associated protein, putative	-1.80054	8.8436e-40	-1.92573	4.04169e-45	-2.38593	8.77829e-64	-0.585386	0.00047718	-0.460195	0.011614
TcCLB.511047.40	NADH-cytochrome b5 reductase, putative	-1.63032	2.29755e-69	-1.97936	7.35133e-100	-2.39891	4.56937e-137	-0.768593	4.34457e-13	-0.419543	0.000370755
TcCLB.511135.20	hypothetical protein, conserved	-1.05618	5.01573e-68	-1.42909	1.4981e-122	-1.59616	3.29278e-149	-0.539978	3.13793e-16	-0.167069	0.038732
TcCLB.511415.11	retrotransposon hot spot (RHS) protein, putative (fragment)	-1.04361	0.0090218	-1.00613	0.0105256	-1.2914	0.00111776	-0.247792	0.695708	-0.285277	0.666089
TcCLB.511417.70	Histone-lysine N-methyltransferase, H3 lysine-76 specific	-1.18381	2.60697e-36	-1.65737	1.23702e-67	-1.6504	3.39129e-65	-0.466592	2.89513e-05	0.00697186	0.975753
TcCLB.511529.80	kinetoplast-associated protein 3	-1.38377	2.3607e-22	-1.88524	4.04984e-39	-1.88827	4.0688e-38	-0.504495	0.00422477	-0.00302811	0.993775
TcCLB.511555.80	ribonucleoside-diphosphate reductase small chain, putative	-1.02521	1.54342e-52	-1.27082	3.88728e-80	-1.00624	1.17569e-50	0.0189722	0.878122	0.26458	0.00105464
TcCLB.511589.200	S-adenosylhomocysteine hydrolase, putative	-1.1463	1.47949e-76	-1.46799	4.16447e-125	-2.04061	4.51718e-235	-0.894309	2.5957e-43	-0.572618	5.55017e-17
TcCLB.511753.60	ESAG8-associated protein, putative	-1.19007	4.03727e-19	-1.15804	2.31982e-18	-1.41031	3.24454e-25	-0.220234	0.249766	-0.252266	0.197957
TcCLB.424195.5	hypothetical protein, conserved	-0.717661	0.0286254	-1.17015	0.000222965	-0.397618	0.235519	0.320043	0.454601	0.772535	0.0469666
TcCLB.441401.10	imidazolonepropienase, putative	-0.14733	0.800509	-1.06779	0.0220666	-0.401248	0.414014	-0.253918	0.699597	0.666538	0.279187
TcCLB.442383.19	hypothetical protein	-0.975342	1.61376e-13	-1.31512	3.43745e-23	-1.29163	7.03242e-22	-0.316287	0.064424	0.023486	0.931102
TcCLB.461515.10	mucin TcMUCI, putative (fragment)	-0.635782	0.0800202	-1.04735	0.00173832	-1.72893	5.81969e-08	-1.09315	0.00209022	-0.681583	0.0949046
TcCLB.482471.10	Mitochondrial ATP synthase subunit, putative	-0.850762	3.09971e-26	-1.25072	6.84672e-54	-1.264	3.03002e-53	-0.413235	1.06934e-05	-0.0132769	0.93603
TcCLB.503557.30	hypothetical protein, conserved	-0.803113	7.21397e-14	-1.17258	1.65016e-27	-1.01567	1.06742e-20	-0.212553	0.141	0.156911	0.352813
TcCLB.503599.50	hypothetical protein, conserved	-0.698939	0.00692037	-1.30668	2.50029e-07	-1.13674	8.1463e-06	-0.437797	0.186821	0.169939	0.708961
TcCLB.503955.20	mitochondrial DNA polymerase beta, putative	-0.953763	2.45797e-36	-1.07665	4.3353e-46	-1.13671	1.44054e-50	-0.182944	0.0564253	-0.060053	0.647877
TcCLB.504005.54	hypothetical protein, conserved	-0.433311	0.0511654	-1.17658	2.85884e-09	-0.984855	6.70753e-07	-0.551544	0.0152828	0.191721	0.528221
TcCLB.504041.4	RNA polymerase I	-0.519599	0.0996417	-1.00892	0.000644762	-0.499131	0.103836	0.0204679	0.969785	0.509788	0.195257
TcCLB.504427.240	metallo-beta-lactamase-like protein, putative	-0.540452	2.21185e-05	-1.13926	1.89225e-19	-1.04739	2.89704e-16	-0.506943	0.000541712	0.091868	0.692549
TcCLB.505931.10	surface protease GP63, putative	0.187896	0.843226	-2.02398	0.0198072	0.0207539	0.982564	-0.167142	0.885037	2.04473	NA
TcCLB.505945.10	DNA repair and recombination helicase protein PIF5, putative	-0.912275	1.47472e-26	-1.0119	1.72036e-32	-1.10525	2.98346e-37	-0.192975	0.0867809	-0.0933487	0.509613
TcCLB.506165.16	protein kinase, putative	-0.826109	6.47932e-06	-1.01684	1.98407e-08	-0.94542	2.30807e-07	-0.119311	0.688834	0.0714226	0.834093
TcCLB.506211.160	Mitochondrial ADP/ATP carrier protein 5, putative	-0.982113	4.86997e-42	-1.06757	9.50578e-50	-1.25119	7.33327e-68	-0.269077	0.00123446	-0.183617	0.0486551
TcCLB.506289.9	DNA ligase, putative (fragment)	-0.73949	1.42648e-11	-1.17736	2.19397e-27	-1.14493	1.57168e-25	-0.405436	0.00146098	0.0324376	0.879972
TcCLB.506401.160	kinetoplastid kinetochore protein 9	-0.845989	7.6168e-16	-1.01289	4.30762e-22	-1.06699	1.41451e-23	-0.221003	0.114101	-0.0541036	0.78318
TcCLB.506503.170	hypothetical protein, conserved	-0.610692	0.00164963	-1.0135	7.721e-08	-0.501879	0.00935702	0.108813	0.716115	0.511622	0.02931
TcCLB.506513.80	hypothetical protein, conserved	-0.884962	2.92994e-19	-1.33474	5.50018e-42	-1.50336	2.49113e-51	-0.618398	1.75924e-08	-0.16862	0.251463
TcCLB.506517.149	Acyl CoA binding protein, putative	-0.691245	1.93677e-11	-1.02713	6.22419e-24	-0.939684	4.75631e-20	-0.24844	0.0504929	0.0874441	0.614587
TcCLB.506533.106	mucin TcSMUGL, putative	-0.806622	0.00495611	-1.09354	6.88205e-05	-1.21264	6.83376e-06	-0.406023	0.246092	-0.119109	0.797467
TcCLB.506683.30	hypothetical protein, conserved	-0.907559	2.47891e-09	-1.21073	1.11023e-15	-1.26108	1.65415e-16	-0.353519	0.0670499	-0.0503455	0.864537
TcCLB.506691.64	cytochrome c oxidase copper chaperone, putative	-0.911877	8.0297e-10	-1.04091	1.46207e-12	-0.410894	0.00708676	0.500983	0.00273841	0.630012	0.000183984
TcCLB.506795.90	'Cold-shock' DNA-binding domain containing protein, putative	-0.862362	2.61762e-22	-1.09073	6.06872e-35	-0.988321	1.32304e-28	-0.125959	0.317684	0.102413	0.470078
TcCLB.506811.210	cell division cycle protein 45 (CDC45), putative	-0.880408	2.62079e-23	-1.0358	8.87677e-32	-1.1824	1.9861e-39	-0.301989	0.00520007	-0.146599	0.274367
TcCLB.506825.190	hypothetical protein	-0.865877	4.22223e-18	-1.11949	1.16138e-29	-1.67544	5.26085e-62	-0.809566	8.53303e-14	-0.55595	1.67866e-06
TcCLB.506885.14	ribosomal protein L37, putative	-0.771613	1.62871e-08	-1.02531	2.41376e-14	-0.77902	8.46194e-09	-0.00740729	0.976149	0.246288	0.186863
TcCLB.507611.270	hypothetical protein, conserved	-0.927328	2.04978e-13	-1.20225	5.72499e-22	-1.41879	9.147e-30	-0.491459	0.00061069	-0.216533	0.225255
TcCLB.507711.20	paraflagellar rod component, putative	-0.874677	1.63115e-18	-1.01438	1.22956e-24	-0.854875	8.36118e-18	0.0198025	0.917068	0.159503	0.26791
TcCLB.507875.20	glutamate dehydrogenase, putative	-0.833385	7.75076e-18	-1.32534	1.67548e-44	-1.45003	2.67131e-53	-0.616649	1.17894e-09	-0.124695	0.37861
TcCLB.507979.4	histone H2A variant Z (fragment)	-0.90536	2.71852e-08	-1.02071	2.48076e-10	-1.00449	5.87697e-10	-0.0991332	0.709516	0.0162149	0.95929
TcCLB.508093.29	hypothetical protein, conserved (pseudogene)	-0.727691	0.0297778	-1.15174	0.000371875	-1.11519	0.000636164	-0.387502	0.389992	0.0365452	0.954559
TcCLB.508209.120	10 kDa heat shock protein, putative	-1.18398	0.0955057	-1.38257	0.0458786	0.03641	0.965813	1.22039	0.111409	1.41898	0.0736737
TcCLB.508647.200	triosephosphate isomerase	-0.949837	1.66921e-34	-1.03795	2.95399e-41	-1.01574	2.38255e-39	-0.0658995	0.584719	0.0222134	0.881326
TcCLB.508785.4	Mitochondrial ATP synthase subunit, putative	-0.962183	7.99451e-29	-1.22121	1.10956e-45	-1.22788	1.52365e-45	-0.265702	0.0111486	-0.00667815	0.972695
TcCLB.508839.80	amidase, putative	-0.87719	1.34162e-20	-1.23834	1.98387e-39	-1.30811	1.35612e-42	-0.430919	8.37938e-05	-0.0697695	0.683507
TcCLB.509081.10	elongation factor 1-gamma (EF-1-gamma), putative	-0.329859	0.742947	-1.99316	0.0178917	-0.91021	0.285807	-0.580351	0.60351	1.08295	0.34457
TcCLB.509129.10	Mitochondrial outer membrane protein porin, putative	-0.765317	3.38494e-18	-1.00929	3.60333e-31	-1.559	6.95734e-71	-0.793685	1.31102e-17	-0.549709	2.82907e-08
TcCLB.509141.40	Mitochondrial outer membrane protein porin, putative	-0.793111	5.44279e-17	-1.12761	1.32123e-33	-1.45468	2.19148e-54	-0.661571	5.2577e-11	-0.327073	0.00427764
TcCLB.509589.20	squalene monooxygenase, putative	-0.98419	6.82176e-42	-1.0577	1.83243e-48	-1.08449	8.03501e-51	-0.100305	0.323626	-0.0267903	0.843806
TcCLB.509979.119	hypothetical protein, conserved	-0.795601	1.12484e-11	-1.05964	1.13372e-19	-0.954605	5.60622e-16	-0.159004	0.341697	0.105034	0.598785
TcCLB.510091.110	mitochondrial RNA binding complex 1 subunit, putative	-0.978369	3.21531e-18	-1.08699	2.6646e-22	-1.24084	5.81874e-28	-0.262469	0.0682241	-0.15385	0.373527
TcCLB.510101.180	40S ribosomal protein S5, putative	-0.939028	1.07835e-13	-1.06503	2.29646e-17	-0.942591	8.75181e-14	-0.00356271	0.98746	0.122442	0.554053
TcCLB.510123.10	Mitochondrial large ribosomal subunit mL40, putative	-0.818633	4.81534e-25	-1.0576	8.10742e-41	-1.07055	8.71896e-41	-0.251917	0.00928121	-0.0129512	0.934898
TcCLB.510145.20	cofilin/actin depolymerizing factor, putative	-0.84983	6.1896e-19	-1.02454	2.73234e-27	-1.20529	4.92351e-37	-0.355459	0.0011775	-0.180753	0.170773
TcCLB.510181.9	inositol-3-phosphate synthase, putative (fragment)	-0.859319	1.96997e-12	-1.0539	3.78438e-18	-1.11405	1.10651e-19	-0.254731	0.108619	-0.0601511	0.787695
TcCLB.510349.50	CDP-diacylglycerol--inositol 3-phosphatidyltransferase, putative	-0.942662	8.44153e-15	-1.18565	1.75567e-22	-1.10464	2.33064e-19	-0.161974	0.359704	0.0810157	0.715503
TcCLB.510351.31	histone H4, putative	-0.785426	0.121478	-1.58851	0.00112762	-2.03615	7.26632e-05	-1.25072	0.0406376	-0.447635	0.605044
TcCLB.510533.80	ChaC-like protein, putative	-0.658636	1.12866e-08	-1.02242	5.481e-19	-1.50587	3.23057e-35	-0.847235	1.87819e-10	-0.483448	0.00129344
TcCLB.510603.60	protein tyrosine phosphatase-like protein, putative	-0.93634	6.09126e-13	-1.18138	9.17316e-20	-1.51738	9.5327e-30	-0.581038	0.000166348	-0.335999	0.0615551
TcCLB.510603.80	protein tyrosine phosphatase-like protein, putative	-0.903066	3.20469e-21	-1.06506	5.14698e-29	-1.06696	1.74106e-28	-0.163891	0.214309	-0.00189326	0.993918
TcCLB.510719.30	ribosomal protein L29, putative	-0.822762	0.112165	-1.56654	0.00206403	-0.832758	0.0997328	-0.00999651	0.990053	0.733784	0.306831
TcCLB.510755.98	kinetoplastid membrane protein 11	-0.854747	1.37199e-05	-1.00546	2.19872e-07	-0.563225	0.00437715	0.291522	0.259158	0.442238	0.0779162
TcCLB.511133.20	thymidine kinase, putative	-0.95877	2.26996e-16	-1.29118	2.73037e-28	-1.61681	9.49031e-41	-0.658041	1.37588e-06	-0.325633	0.0435971
TcCLB.511179.130	hypothetical protein, conserved	-0.639858	3.04273e-09	-1.06907	8.84228e-24	-1.00476	6.86876e-21	-0.364901	0.00350796	0.06431	0.738576
TcCLB.511311.45	C/D small nucleolar RNA (snoRNA), TB5C1C1	-0.341652	0.709326	-1.78872	0.0261007	-0.377018	0.657932	-0.0353665	0.976628	1.4117	0.155965
TcCLB.511355.24	hypothetical protein, conserved	-0.835438	9.23262e-09	-1.13456	6.33998e-15	-0.989167	1.705e-11	-0.153729	0.484768	0.145396	0.556569
TcCLB.511365.80	mitochondrial carrier protein, putative	-0.680048	0.000155846	-1.12126	1.87865e-10	-0.929437	1.46111e-07	-0.249389	0.301232	0.191822	0.492746
TcCLB.511369.30	elongation factor 1-alpha, putative	-0.256419	0.810892	-1.83734	0.0434283	-0.457198	0.627432	-0.200779	0.880192	1.38015	NA
TcCLB.511679.10	mucin TcSMUGS, putative	-0.989305	1.06247e-13	-1.26158	1.45526e-21	-1.46062	1.04486e-27	-0.471314	0.00269897	-0.199039	0.321481
TcCLB.511685.10	mucin TcSMUGS, putative	-0.677302	0.0106246	-1.11371	7.50849e-06	-1.16713	2.01795e-06	-0.489828	0.103154	-0.0534168	0.905532
TcCLB.511685.30	mucin TcSMUGS, putative	-0.694579	0.232072	-1.40117	0.00706354	-1.96988	9.2096e-05	-1.2753	0.0280274	-0.568714	0.442486
TcCLB.511687.19	Mitochondrial outer membrane protein porin, putative (fragment)	-0.781348	0.107041	-1.29967	0.00458671	-0.700241	0.137817	0.081107	0.919245	0.599429	0.34487
TcCLB.511737.9	Translation machinery associated TMA7, putative	-0.730223	0.261592	-1.36989	0.0254952	-0.728538	0.243425	0.0016848	0.998603	0.641355	0.465974
TcCLB.511751.160	hypothetical protein, conserved	-0.774577	8.7675e-22	-1.04131	5.73066e-39	-1.30916	2.67428e-60	-0.53458	6.47899e-10	-0.267848	0.00655421
TcCLB.511805.15	ribosomal protein S29, putative	-0.660249	7.08881e-07	-1.07501	6.41378e-17	-0.912485	1.49049e-12	-0.252236	0.121981	0.162525	0.397583
TcCLB.511871.30	2OG-Fe(II) oxygenase superfamily, putative	-0.906982	1.91594e-26	-1.1278	4.87811e-40	-1.1561	7.00977e-41	-0.249116	0.019318	-0.0282942	0.867133
TcCLB.511911.94	hypothetical protein, conserved	-0.975121	4.30749e-33	-1.1481	1.40327e-45	-1.02148	3.37724e-36	-0.0463619	0.735714	0.12662	0.289634
TcCLB.405165.19	hypothetical protein, conserved (fragment)	-0.373214	0.0230503	-0.324103	0.0474798	-1.07138	3.72287e-12	-0.698166	3.81036e-05	-0.747278	1.54164e-05
TcCLB.405179.10	dynein heavy chain, putative (fragment)	-0.381559	0.0205699	-0.0290716	0.887844	-1.04962	5.42063e-12	-0.668065	6.51663e-05	-1.02055	3.76922e-10
TcCLB.413977.10	guide RNA associated protein, GAP1, putative	-0.74449	1.32382e-19	-0.992815	8.03307e-34	-1.08732	3.57699e-39	-0.342826	0.000350533	-0.0945016	0.478915
TcCLB.420091.10	dispersed gene family protein 1 (DGF-1), putative	0.235353	0.697166	0.309763	0.584022	-1.32284	0.0143775	-1.5582	0.00641194	-1.63261	0.00549822
TcCLB.426397.9	kinesin, putative (fragment)	-0.761487	8.07577e-08	-0.872295	4.6185e-10	-1.53589	5.3008e-27	-0.774403	9.35162e-07	-0.663595	6.72131e-05
TcCLB.436521.9	mevalonate kinase, putative (fragment)	-0.881858	8.6161e-32	-0.998581	1.39967e-40	-1.16887	1.51744e-53	-0.287014	0.00127135	-0.170292	0.0998321
TcCLB.437545.10	3-oxo-5-alpha-steroid 4-dehydrogenase, putative	-0.631349	7.86458e-22	-0.788376	8.7953e-34	-1.19372	3.65705e-74	-0.562371	8.11026e-16	-0.405345	4.79723e-08
TcCLB.441061.9	dynein heavy chain, putative (fragment)	-0.605025	0.0255605	-0.160548	0.610049	-1.63985	3.71119e-10	-1.03482	0.000415555	-1.4793	2.14311e-07
TcCLB.441241.10	microtubule-associated protein Gb4, putative (fragment)	-0.189986	0.780784	0.430427	0.459436	-1.13781	0.042044	-0.947821	0.148594	-1.56823	0.00957451
TcCLB.448567.9	dynein heavy chain, putative	-0.701337	0.0687026	-0.209924	0.636798	-1.30421	0.000198747	-0.602878	0.167826	-1.09429	0.00657089
TcCLB.473633.9	dispersed gene family protein 1 (DGF-1), putative (fragment)	-0.0156322	0.985347	-0.238283	0.753777	-1.46779	0.0340996	-1.45216	0.0598946	-1.2295	0.151347
TcCLB.474341.9	dynein heavy chain, putative	-0.521599	0.00638408	-0.598236	0.00126304	-1.53621	1.84411e-17	-1.01461	1.94979e-07	-0.937974	3.80334e-06
TcCLB.484311.10	calpain-like cysteine peptidase, putative (fragment)	-0.258672	0.739436	0.0670647	0.930745	-1.82992	0.00728466	-1.57125	0.0421588	-1.89699	0.0138434
TcCLB.503419.50	MRB1-associated protein, putative	-0.800523	4.40127e-20	-0.988923	3.16485e-30	-1.03642	1.09745e-32	-0.235893	0.0266905	-0.0474925	0.762098
TcCLB.503577.9	delta-1-pyrroline-5-carboxylate dehydrogenase (pseudogene), putative	-0.402617	0.000483423	-0.758603	3.80186e-12	-1.09972	3.55832e-24	-0.697101	1.71385e-09	-0.341116	0.0104489
TcCLB.503637.30	serine peptidase, Clan SC, Family S9B	-0.206426	0.00969344	-0.535901	2.93629e-13	-1.08987	4.01764e-49	-0.883442	4.77906e-31	-0.553968	1.07607e-11
TcCLB.503665.21	elongation factor 1-gamma (EF-1-gamma, pseudogene), putative	0.455422	0.436246	0.484229	0.387121	-1.22691	0.0331979	-1.68233	0.0044692	-1.71113	0.00526018
TcCLB.503757.10	40S ribosomal protein SA, putative	-0.691926	2.19857e-20	-0.794351	9.60161e-27	-1.14524	4.02867e-53	-0.453319	3.02888e-08	-0.350894	5.49095e-05
TcCLB.503799.4	aurora B kinase, putative (fragment)	-0.714867	3.32699e-09	-0.887347	1.33123e-13	-1.05251	7.97454e-18	-0.337642	0.0241747	-0.165162	0.379536
TcCLB.503895.19	hypothetical protein	-0.279882	0.331845	-0.131799	0.67062	-1.07965	4.98509e-06	-0.79977	0.00219664	-0.947853	0.000307102
TcCLB.503897.20	hypothetical protein, conserved	-0.755946	1.04737e-16	-0.996016	1.62237e-28	-1.5322	1.99104e-64	-0.776254	6.55577e-16	-0.536184	1.69631e-07
TcCLB.504089.50	Flagellar radial spoke protein 4/6	-0.5354	3.40569e-10	-0.680872	4.12762e-16	-1.00994	9.35835e-34	-0.474543	1.83784e-07	-0.329071	0.000844118
TcCLB.504133.15	hypothetical protein, conserved (fragment)	-0.849159	0.0106659	-0.120536	0.760818	-2.04266	8.29421e-09	-1.1935	0.00372568	-1.92213	6.19402e-07
TcCLB.504133.45	Temperature dependent protein affecting M2 dsRNA replication, putative	-0.932783	0.096634	-0.125203	0.851252	-1.61895	0.00150846	-0.686166	0.299751	-1.49375	0.0106022
TcCLB.504137.80	adenylyl cyclase-associated protein, putative	-0.64752	9.17373e-08	-0.933028	2.98655e-15	-1.10389	1.02271e-20	-0.456369	0.00068711	-0.170861	0.326866
TcCLB.504147.70	hypothetical protein, conserved	-0.731563	1.73104e-14	-0.877021	2.3394e-20	-1.07384	9.60345e-29	-0.34228	0.00258144	-0.196821	0.143155
TcCLB.504153.120	hypothetical protein, conserved	-0.641755	1.23048e-14	-0.715873	3.49968e-18	-1.14167	1.55737e-44	-0.499914	1.6414e-08	-0.425796	4.36951e-06
TcCLB.504423.30	hypothetical protein, conserved	-0.745439	3.25882e-17	-0.723193	2.00222e-16	-1.10485	3.48719e-37	-0.359413	0.000243844	-0.381659	0.00014
TcCLB.504557.20	UDP-Gal or UDP-GlcNAc-dependent glycosyltransferase, putative	-0.45577	0.0827052	-0.886314	0.00030431	-1.47642	5.93585e-09	-1.02065	0.00029841	-0.590102	0.0769884
TcCLB.504557.50	dispersed gene family protein 1 (DGF-1), putative	-0.42965	0.312233	-0.73519	0.0612381	-1.56949	9.30077e-05	-1.13984	0.0131532	-0.834302	0.112121
TcCLB.504625.70	kinetoplast DNA-associated protein, putative	-0.746626	3.91554e-15	-0.92327	1.28734e-22	-1.32121	7.07753e-43	-0.574583	6.41287e-08	-0.397939	0.000568743
TcCLB.505807.60	hypothetical protein, conserved	-0.848266	2.48397e-20	-0.913575	1.45291e-23	-1.03774	1.31123e-29	-0.189474	0.110816	-0.124166	0.371817
TcCLB.506097.9	dynein heavy chain, putative (fragment)	-0.755347	0.0016826	-0.601729	0.0129596	-1.63614	2.30625e-13	-0.880789	0.000383545	-1.03441	3.50936e-05
TcCLB.506127.30	phenylalanyl-tRNA synthetase, putative	-0.619381	9.61478e-08	-0.798959	2.04889e-12	-1.13314	1.70201e-23	-0.51376	4.93404e-05	-0.334182	0.0182917
TcCLB.506135.70	hypothetical protein, conserved	-0.66358	1.79621e-11	-0.960805	1.19336e-22	-1.23561	1.66091e-34	-0.57203	3.28007e-07	-0.274805	0.0386349
TcCLB.506163.50	hypothetical protein, conserved	-0.790941	2.70601e-27	-0.950221	3.43939e-39	-1.00217	6.78444e-43	-0.211226	0.0170911	-0.0519459	0.68575
TcCLB.506167.20	STAG domain containing protein, putative	-0.591409	6.46861e-16	-0.753011	1.99258e-25	-1.07684	3.4468e-50	-0.485435	5.19692e-10	-0.323834	0.000123398
TcCLB.506181.104	actyltransferase-like protein	-0.341069	0.0325268	-0.851044	6.59913e-09	-1.14348	1.03549e-14	-0.80241	4.79527e-07	-0.292435	0.149542
TcCLB.506227.190	hypothetical protein	-0.352013	0.0586337	-0.909476	1.21733e-07	-1.1616	3.29785e-11	-0.809591	2.47836e-05	-0.252128	0.334624
TcCLB.506239.40	U-box domain containing protein, putative	-0.468803	7.95139e-06	-0.553039	6.95745e-08	-1.15083	2.14332e-30	-0.682024	2.10653e-10	-0.597789	9.58148e-08
TcCLB.506265.130	hypothetical protein, conserved	-0.584556	4.18042e-08	-0.98519	4.93502e-21	-1.26201	3.11288e-32	-0.677451	5.63893e-09	-0.276817	0.0492262
TcCLB.506351.20	hypothetical protein, conserved	-0.582305	1.15719e-10	-0.785825	7.9517e-19	-1.32461	1.05806e-49	-0.742302	6.38974e-15	-0.538782	1.01318e-07
TcCLB.506367.30	1,2-Dihydroxy-3-keto-5-methylthiopentene dioxygenase, putative	-0.616489	7.1139e-23	-0.808654	3.48564e-39	-1.08408	2.62612e-69	-0.467592	1.38388e-12	-0.275427	0.000123996
TcCLB.506405.50	serine-palmitoyl-CoA transferase, putative	-0.626822	4.90872e-25	-0.824697	1.09497e-42	-1.08683	9.41952e-71	-0.460006	3.67289e-12	-0.262131	0.000321289
TcCLB.506411.10	thimet oligopeptidase, putative	-0.87392	5.83652e-14	-0.946414	2.21665e-16	-1.93831	3.05299e-63	-1.06439	2.72479e-18	-0.991893	2.82649e-15
TcCLB.506525.45	hypothetical protein, conserved (pseudogene)	-0.360989	0.0271277	-0.751129	8.07604e-07	-1.00133	6.51122e-11	-0.640341	0.000160909	-0.250202	0.253837
TcCLB.506529.120	hypothetical protein	-0.401096	4.00129e-05	-0.624338	3.53779e-11	-1.10448	3.08497e-31	-0.703386	3.85325e-12	-0.480145	1.10956e-05
TcCLB.506529.410	primase 2, putative	-0.636063	1.74987e-14	-0.664611	7.30559e-16	-1.15843	3.40655e-44	-0.522371	8.87706e-09	-0.493823	1.56098e-07
TcCLB.506529.669	Eukaryotic protein of unknown function (DUF866), putative	-0.523484	0.00190016	-0.598835	0.000276321	-1.38544	1.65039e-16	-0.861956	3.12243e-06	-0.786605	4.7612e-05
TcCLB.506533.34	phosphatidylinositol kinase related protein, putative	-0.275559	0.0169945	-0.239216	0.0376963	-1.0981	3.01279e-26	-0.82254	4.0429e-14	-0.858884	9.33804e-15
TcCLB.506543.20	ATP-grasp domain containing protein, putative	-0.745516	1.54157e-22	-0.841162	1.51912e-28	-1.01281	1.16089e-39	-0.267297	0.00326219	-0.17165	0.100265
TcCLB.506563.10	pumilio/PUF RNA binding protein 9, putative	-0.59646	4.54456e-10	-0.977157	3.75213e-25	-1.15709	1.36471e-33	-0.560634	9.89e-08	-0.179936	0.187469
TcCLB.506563.70	unspecified product	-0.63377	2.0664e-05	-0.753155	2.50022e-07	-1.04253	1.43408e-12	-0.408758	0.0206509	-0.289373	0.151347
TcCLB.506647.20	hypothetical protein, conserved	-0.426865	1.82725e-07	-0.506342	2.99501e-10	-1.04406	1.39982e-38	-0.617199	6.95079e-13	-0.537722	1.83144e-09
TcCLB.506649.20	P-type H+-ATPase, putative	-0.459695	6.64406e-09	-0.595139	1.46361e-14	-1.03186	4.84041e-42	-0.572162	1.39707e-12	-0.436718	2.89578e-07
TcCLB.506649.90	hypothetical protein, conserved	-0.354639	2.0904e-05	-0.363689	9.19295e-06	-1.03806	7.29823e-40	-0.68342	1.2516e-16	-0.67437	1.49913e-15
TcCLB.506691.14	ATP-dependent DEAD/H RNA helicase, putative (fragment)	-0.684485	9.3545e-07	-0.481089	0.000656843	-1.28473	2.84168e-21	-0.600246	7.34954e-05	-0.803642	8.95073e-08
TcCLB.506739.30	hypothetical protein	-0.251943	0.00468798	-0.383619	5.8213e-06	-1.00994	5.03128e-34	-0.757993	2.58408e-18	-0.626317	4.45103e-12
TcCLB.506749.30	Flagellar calcium-binding protein (fragment)	-0.384015	0.0433741	-0.535827	0.0030325	-1.07924	2.75153e-09	-0.695225	0.000633086	-0.543413	0.0147478
TcCLB.506753.130	rhodanese-like domain containing protein, putative	-0.745183	0.00380368	-0.6666	0.00923864	-1.08415	7.53057e-06	-0.338968	0.2881	-0.417551	0.194827
TcCLB.506775.80	14-3-3 protein 2, putative	-0.958557	7.83567e-16	-0.932181	3.44674e-15	-1.14982	1.08706e-22	-0.191261	0.222498	-0.217637	0.176009
TcCLB.506795.44	Bifunctional NAD(P)H-hydrate repair enzyme	-0.732607	2.12068e-24	-0.96908	5.67591e-42	-1.12106	2.49654e-54	-0.388455	1.41811e-06	-0.151983	0.127907
TcCLB.506847.4	hypothetical protein, conserved	-0.468428	0.0198979	-0.967651	3.67679e-07	-1.34452	5.71285e-12	-0.876088	4.96454e-05	-0.376865	0.166904
TcCLB.506849.20	dynein heavy chain (pseudogene), putative	-0.630411	0.124822	-0.104315	0.828333	-2.05239	1.38201e-08	-1.42198	0.000348066	-1.94807	6.70208e-07
TcCLB.506857.20	pyrroline-5-carboxylate reductase, putative	-0.702121	6.23316e-18	-0.815929	4.88056e-24	-1.07993	1.1929e-40	-0.377812	3.3173e-05	-0.264003	0.00840647
TcCLB.506859.70	guide RNA associated protein, GAP2, putative	-0.674529	1.16814e-21	-0.91725	2.17167e-39	-1.15471	2.13117e-60	-0.480178	3.46107e-10	-0.237457	0.00657244
TcCLB.506885.340	Mitochondrial import receptor subunit ATOM40, putative	-0.678416	1.17294e-23	-0.872491	1.19539e-38	-1.12471	1.55072e-61	-0.44629	1.78613e-09	-0.252215	0.00236661
TcCLB.506925.150	protein phosphatase 2C, putative	-0.717779	0.0440516	-0.389226	0.305805	-1.15001	0.000409913	-0.43223	0.308945	-0.760783	0.0532374
TcCLB.506925.360	hypothetical protein	-0.702133	9.74768e-14	-0.869851	2.07621e-20	-1.30298	1.97554e-40	-0.600842	3.20439e-08	-0.433124	0.000228932
TcCLB.506925.490	kinetoplastid kinetochore protein 7	-0.71278	8.04619e-11	-0.775324	9.27731e-13	-1.19484	1.89822e-27	-0.482057	0.000116492	-0.419512	0.00154147
TcCLB.506925.550	cysteine peptidase, Clan CA, family C2, putative, frameshift	-0.42977	0.456968	0.391286	0.484708	-1.45753	0.00223649	-1.02776	0.0634183	-1.84882	0.000313309
TcCLB.506931.70	hypothetical protein, conserved	-0.411989	0.00182254	-0.612922	1.35946e-06	-1.19065	1.27691e-20	-0.778663	1.6633e-08	-0.57773	9.69126e-05
TcCLB.506933.20	ribonucleoside-diphosphate reductase large chain, putative	-0.684906	1.58772e-13	-0.812509	8.55101e-19	-1.06235	6.51024e-31	-0.377447	0.000302465	-0.249844	0.0332526
TcCLB.506945.240	ATP synthase, epsilon chain, putative	-0.76728	1.17497e-21	-0.993875	8.79798e-36	-1.04734	3.85722e-39	-0.280058	0.00280199	-0.0534625	0.706289
TcCLB.506947.110	myosin heavy chain, putative, frameshift	-0.640468	7.16726e-06	-0.728567	1.89996e-07	-1.51848	7.92533e-28	-0.87801	4.57524e-09	-0.78991	4.17886e-07
TcCLB.506951.10	retrotransposon hot spot protein (RHS, pseudogene), putative	-0.650426	0.403037	-0.59574	0.432531	-1.59517	0.0315271	-0.944741	0.322723	-0.999427	NA
TcCLB.506967.20	hypothetical protein	-0.675458	0.310546	-0.291236	0.678444	-1.54392	0.0163691	-0.868464	0.297036	-1.25269	0.113274
TcCLB.506973.70	dispersed gene family protein 1 (DGF-1), putative	-0.349503	0.217446	-0.136854	0.65837	-1.42742	1.15733e-07	-1.07791	0.000290112	-1.29056	1.3465e-05
TcCLB.507011.30	CRAL/TRIO domain containing protein, putative	-0.692912	2.73679e-12	-0.883389	3.29251e-19	-1.19051	1.21318e-31	-0.497596	1.60678e-05	-0.307119	0.0189334
TcCLB.507037.80	hypothetical protein, conserved	-0.77007	1.70776e-13	-0.872104	4.81424e-17	-1.2992	8.87012e-34	-0.529129	1.36323e-05	-0.427096	0.00102317
TcCLB.507039.10	iron superoxide dismutase, putative	-0.657203	4.00246e-08	-0.814483	3.62654e-12	-1.09379	4.49575e-21	-0.43659	0.000940461	-0.279311	0.0619995
TcCLB.507089.260	cyclin 6, putative	-0.799591	6.33359e-20	-0.989828	1.22118e-29	-1.27799	4.44433e-45	-0.478402	3.38552e-06	-0.288165	0.0136654
TcCLB.507093.220	RNA-binding protein UBP1, putative	-0.706975	6.26163e-10	-0.708328	4.26216e-10	-1.10985	3.25843e-22	-0.402878	0.0025674	-0.401526	0.00393283
TcCLB.507093.229	U-rich RNA-binding protein UBP-2	-0.619754	5.08007e-08	-0.574388	3.71074e-07	-1.09843	1.91028e-22	-0.478681	0.000170917	-0.524047	5.36185e-05
TcCLB.507213.60	retrotransposon hot spot protein (RHS, pseudogene), putative	-0.833939	0.0210265	-0.395655	0.296846	-1.61825	1.33973e-05	-0.784313	0.0931177	-1.2226	0.00490374
TcCLB.507445.50	myosin heavy chain, putative	-0.555582	5.05744e-05	-0.668336	5.69369e-07	-1.3316	5.25675e-24	-0.776021	5.11761e-08	-0.663267	9.5115e-06
TcCLB.507483.30	calmodulin, putative	-0.979989	1.6948e-13	-0.974747	1.63841e-13	-1.09293	1.14526e-16	-0.11294	0.574785	-0.118181	0.58126
TcCLB.507531.19	phosphatidylinositol 4-kinase alpha, putative	-0.761542	2.19729e-07	-0.584745	7.26522e-05	-1.65176	1.15867e-28	-0.890214	4.62801e-08	-1.06701	6.31447e-11
TcCLB.507533.10	phosphatidylinositol 4-kinase alpha, putative	-0.505143	0.000351825	-0.533777	0.000120498	-1.02959	2.65531e-14	-0.524447	0.000564888	-0.495813	0.0018159
TcCLB.507595.10	dispersed gene family protein 1 (DGF-1, pseudogene), putative	-0.189092	NA	-0.026736	NA	-3.59309	0.0258814	-3.404	NA	-3.56636	NA
TcCLB.507603.270	major cysteine proteinase, putative	-0.811172	2.13969e-05	-0.492192	0.0126364	-1.39457	1.41763e-14	-0.583396	0.00501162	-0.902376	7.80326e-06
TcCLB.507641.190	kinetoplastid kinetochore protein 1, putative	-0.43614	6.925e-08	-0.551218	3.37587e-12	-1.01659	1.13496e-37	-0.58045	7.54817e-12	-0.465372	1.98866e-07
TcCLB.507719.9	dispersed gene family protein 1 (DGF-1), putative	-0.187504	0.154391	0.0162262	0.917615	-1.00206	1.40275e-19	-0.814557	2.29205e-12	-1.01829	2.44505e-18
TcCLB.507795.60	tryptophanyl-tRNA synthetase, putative, frameshift	-0.602406	1.38977e-13	-0.742633	2.55573e-20	-1.16858	1.28029e-47	-0.566169	7.24698e-11	-0.425942	3.9712e-06
TcCLB.507865.9	dispersed gene family protein 1 (DGF-1), putative	-0.00212288	0.997842	-0.516753	0.44971	-1.9262	0.00682247	-1.92407	0.0133274	-1.40944	0.115711
TcCLB.507867.100	hypothetical protein	-0.568204	0.000197963	-0.644673	1.56891e-05	-1.54847	1.18654e-25	-0.980268	6.39998e-10	-0.903799	4.37674e-08
TcCLB.507929.10	kinesin, putative (fragment)	-0.363803	0.126183	-0.262814	0.281532	-1.11995	5.87592e-08	-0.756143	0.000937117	-0.857133	0.000209993
TcCLB.507975.40	dispersed gene family protein 1 (DGF-1), putative	-0.268397	0.390121	0.0534663	0.873286	-1.47768	2.62197e-07	-1.20928	0.000111895	-1.53115	6.854e-07
TcCLB.507999.10	dispersed gene family protein 1 (DGF-1), putative	-0.333697	0.233936	-0.359996	0.185017	-1.18922	3.47677e-06	-0.85552	0.00289284	-0.829221	0.00591915
TcCLB.508147.159	dispersed gene family protein 1 (DGF-1), putative	-1.06976	NA	-0.0570402	0.954319	-1.87977	0.0412558	-0.810006	NA	-1.82273	NA
TcCLB.508163.390	hypothetical protein, conserved	-0.410115	NA	-0.661386	0.435149	-1.78386	0.0391472	-1.37374	NA	-1.12247	NA
TcCLB.508217.9	Inner arm dynein 5-1	-0.440828	0.139321	-0.133916	0.694922	-1.08677	3.49551e-05	-0.645941	0.0342253	-0.952852	0.0012393
TcCLB.508265.100	cytoskeleton associated protein, putative	-0.772551	3.00155e-14	-0.654269	1.39766e-10	-1.09608	2.60283e-28	-0.323529	0.00506944	-0.441811	0.000103105
TcCLB.508271.10	phenylalanyl-tRNA synthetase, putative	-0.615162	3.53414e-08	-0.813533	1.31806e-13	-1.13954	2.32859e-24	-0.524373	3.07357e-05	-0.326003	0.0223102
TcCLB.508281.9	dispersed gene family protein 1 (DGF-1), putative	-0.113888	0.846969	-0.61885	0.204442	-1.17567	0.0147247	-1.06178	0.0509426	-0.556818	0.420243
TcCLB.508325.30	dispersed gene family protein 1 (DGF-1), putative	-0.0727652	0.821651	-0.0411464	0.894765	-1.02206	2.21002e-05	-0.949293	0.000246208	-0.980912	0.000223785
TcCLB.508387.160	Phosphatidylinositol 4-phosphate 5-kinase, putative	-0.532102	7.25735e-12	-0.656767	8.64014e-18	-1.01672	1.7436e-40	-0.484619	4.60376e-09	-0.359954	4.5462e-05
TcCLB.508387.20	methylthioadenosine phosphorylase, putative	-0.647026	1.38981e-20	-0.782497	6.24999e-30	-1.03407	8.41815e-51	-0.38704	3.36818e-07	-0.251568	0.00256099
TcCLB.508567.100	hypothetical protein, conserved	-0.760842	1.28952e-15	-0.587192	8.14306e-10	-1.03612	6.08169e-28	-0.275274	0.0153379	-0.448925	3.4287e-05
TcCLB.508567.60	hypothetical protein	-0.471261	1.1909e-05	-0.702431	1.72353e-11	-1.22432	5.11296e-31	-0.753062	2.97154e-11	-0.521892	1.93842e-05
TcCLB.508569.70	hypothetical protein, conserved	-0.80401	0.000392105	-0.421181	0.0798959	-1.24116	8.00305e-09	-0.437153	0.099934	-0.819981	0.000810563
TcCLB.508715.10	oxidoreductase, putative (fragment)	-0.413099	0.0582573	-0.402892	0.0603009	-1.22858	3.1987e-09	-0.815481	0.000428581	-0.825687	0.000534918
TcCLB.508717.20	NADH dehydrogenase, putative	-0.76267	3.24853e-16	-0.916569	4.1828e-23	-1.39011	6.12763e-50	-0.627437	6.74616e-10	-0.473538	1.23912e-05
TcCLB.508717.36	selenophosphate synthetase, putative	-0.548211	3.45655e-08	-0.752352	1.10321e-14	-1.06123	2.57219e-27	-0.513023	2.10497e-06	-0.308882	0.0113425
TcCLB.508727.50	hypothetical protein, conserved	-0.744895	2.88933e-15	-0.958419	1.35827e-24	-1.03526	5.88269e-28	-0.290362	0.0101671	-0.0768376	0.636346
TcCLB.508769.10	hypothetical protein, conserved (pseudogene)	-0.69699	2.58683e-13	-0.970331	1.28284e-24	-1.10297	2.15023e-30	-0.405984	0.000233479	-0.132643	0.369213
TcCLB.508803.19	dispersed gene family protein 1 (DGF-1), putative	0.0243258	0.973359	0.254698	0.676566	-1.13272	0.0384273	-1.15704	0.0562807	-1.38741	0.0223775
TcCLB.508813.15	heat shock protein 70, putative (fragment)	-0.862762	1.83316e-15	-0.864346	1.13904e-15	-1.01702	8.04319e-21	-0.154261	0.311592	-0.152677	0.348342
TcCLB.508829.9	dynein heavy chain, putative (fragment)	-0.239341	0.263101	-0.145138	0.515035	-1.15641	1.38272e-10	-0.917071	2.03135e-06	-1.01127	2.60411e-07
TcCLB.508831.4	dynein heavy chain, putative	-0.520024	0.0620485	-0.13648	0.676511	-1.60601	6.62727e-11	-1.08599	5.05559e-05	-1.46953	3.51484e-08
TcCLB.508955.20	hypothetical protein, conserved	-0.841346	9.48044e-06	-0.92871	6.07575e-07	-1.38826	1.85101e-14	-0.546914	0.00933825	-0.45955	0.0433451
TcCLB.509067.40	NADH dehydrogenase subunit NI8M, putative	-0.445311	5.13368e-06	-0.851442	1.81409e-19	-1.07661	1.44315e-29	-0.631304	7.419e-10	-0.225172	0.0755088
TcCLB.509099.110	hypothetical protein, conserved	-0.784281	1.275e-10	-0.872887	5.52638e-13	-1.0868	1.29881e-18	-0.302519	0.0506561	-0.213913	0.229088
TcCLB.509099.30	paraflagellar rod protein 5, putative	-0.332826	0.000130916	-0.621666	7.90189e-14	-1.02966	1.20687e-34	-0.696836	3.94194e-15	-0.407997	2.58993e-05
TcCLB.509103.39	dynein heavy chain, putative	-0.65243	0.0373664	-0.547223	0.0812489	-1.94626	2.88418e-12	-1.29383	1.93406e-05	-1.39904	5.76563e-06
TcCLB.509141.20	hypothetical protein	-0.361526	0.00537233	-0.837438	5.62087e-12	-1.42693	8.83736e-31	-1.0654	2.65158e-16	-0.589487	4.16939e-05
TcCLB.509141.30	hypothetical protein	-0.244206	0.192459	-0.846233	2.28645e-07	-1.22828	9.96799e-14	-0.984076	2.06529e-08	-0.382049	0.0784263
TcCLB.509153.90	dihydrofolate reductase-thymidylate synthase	-0.769902	2.71076e-32	-0.994443	1.82516e-53	-1.10659	3.13024e-65	-0.336685	3.21747e-06	-0.112144	0.228067
TcCLB.509157.220	hypothetical protein, conserved	-0.615958	6.09179e-11	-0.978085	3.76122e-26	-1.23403	7.59364e-40	-0.618075	1.01448e-09	-0.255948	0.0340723
TcCLB.509157.80	DnaJ homolog, putative	-0.572413	2.95168e-10	-0.82365	3.12381e-20	-1.05417	2.40336e-31	-0.48176	1.52245e-06	-0.230524	0.0518691
TcCLB.509171.70	hypothetical protein, conserved	-0.619287	9.15952e-07	-0.689494	3.0264e-08	-1.09436	7.95364e-18	-0.475069	0.00127227	-0.404862	0.0106384
TcCLB.509173.9	hypothetical protein, conserved	-0.655649	0.114239	-0.385789	0.37792	-1.46023	7.5096e-05	-0.804582	0.0656399	-1.07444	0.012695
TcCLB.509199.24	ribose 5-phosphate isomerase type B	-0.841021	8.2135e-21	-0.982463	3.14922e-28	-1.3955	3.34469e-54	-0.55448	1.93298e-08	-0.413038	9.12773e-05
TcCLB.509233.150	cytochrome oxidase subunit VII	-0.572554	8.39863e-15	-0.770082	2.58862e-26	-1.04299	2.70946e-47	-0.470441	1.51105e-09	-0.272913	0.00154246
TcCLB.509233.180	ATP synthase subunit beta, mitochondrial, putative	-0.898678	1.25845e-30	-0.957992	5.00711e-35	-1.29554	3.58109e-63	-0.396864	3.5949e-06	-0.337551	0.00017891
TcCLB.509245.10	hypothetical protein, conserved	-0.473298	8.88116e-05	-0.706632	1.60911e-09	-1.25974	6.05408e-26	-0.786443	1.06603e-09	-0.553108	7.39876e-05
TcCLB.509247.60	Temperature dependent protein affecting M2 dsRNA replication, putative	-0.590772	0.0947558	0.0731307	0.861993	-1.65887	1.4526e-07	-1.0681	0.0024858	-1.732	3.48517e-07
TcCLB.509351.10	delta-1-pyrroline-5-carboxylate dehydrogenase, putative	-0.768592	6.11024e-20	-0.944813	7.23898e-30	-1.28508	2.29012e-53	-0.516483	1.53155e-08	-0.340262	0.000602321
TcCLB.509583.19	dynein heavy chain, putative (fragment)	-0.991006	0.0118506	-0.440973	0.305748	-2.1166	5.5299e-09	-1.1256	0.0066232	-1.67563	3.10447e-05
TcCLB.509585.10	dynein heavy chain, putative	-0.462989	6.44482e-06	-0.37429	0.000280002	-1.16913	8.87012e-34	-0.706145	4.83172e-12	-0.794843	1.46692e-14
TcCLB.509599.20	N-terminal region of Chorein, a TM vesicle-mediated sorter, putative	-0.274952	0.317292	0.0581187	0.84903	-1.07054	2.39437e-06	-0.795589	0.00147591	-1.12866	4.31673e-06
TcCLB.509625.30	Protein of unknown function (DUF1014), putative	-0.485171	3.82354e-07	-0.708181	3.33389e-14	-1.04812	2.016e-28	-0.562952	5.19098e-08	-0.339941	0.00331183
TcCLB.509803.70	dispersed gene family protein 1 (DGF-1, pseudogene), putative	-1.29031	NA	-0.26705	NA	-3.16948	0.0371308	-1.87917	NA	-2.90243	NA
TcCLB.509805.260	dispersed gene family protein 1 (DGF-1, pseudogene), putative	-0.279752	0.320131	-0.272875	0.320561	-1.26018	6.3619e-07	-0.98043	0.000430327	-0.987308	0.000584592
TcCLB.509825.14	40S ribosomal protein SA, putative	-0.474465	2.1607e-10	-0.635278	3.92438e-18	-1.07695	3.37572e-49	-0.602484	8.26049e-15	-0.441671	7.99606e-08
TcCLB.509831.36	guide RNA-binding protein of 21 kDa	-0.866889	1.64274e-17	-0.905201	3.42227e-19	-1.03163	1.52709e-24	-0.164736	0.224945	-0.126425	0.408526
TcCLB.509921.9	dispersed gene family protein 1 (DGF-1), putative	0.597122	0.324457	0.632269	0.279079	-1.37968	0.0328803	-1.9768	0.00252814	-2.01195	0.00302511
TcCLB.509965.20	hypothetical protein	-0.441023	5.40931e-06	-0.751238	1.14942e-15	-1.26233	5.08792e-40	-0.821308	4.10462e-16	-0.511094	3.11901e-06
TcCLB.509967.189	kinesin, putative (fragment)	-0.584534	0.00056137	-0.799292	1.30365e-06	-1.38069	8.14834e-16	-0.796158	3.30569e-05	-0.581401	0.0058984
TcCLB.509979.150	nitrilase, putative	-0.493081	1.64513e-06	-0.833977	4.47336e-17	-1.54466	1.35054e-53	-1.05158	7.79114e-24	-0.710686	1.70938e-10
TcCLB.510091.80	pyruvate dehydrogenase E1 beta subunit, putative	-0.76594	2.19586e-26	-0.923265	4.03265e-38	-1.14921	6.16128e-57	-0.383269	2.03135e-06	-0.225944	0.0130525
TcCLB.510101.30	60S ribosomal protein L28, putative	-0.662122	1.42665e-14	-0.854835	8.84228e-24	-1.01441	1.15835e-32	-0.352291	0.000276007	-0.159578	0.180151
TcCLB.510101.320	hypothetical protein	-0.528871	1.83929e-07	-0.688951	3.46744e-12	-1.10575	2.70891e-29	-0.576877	6.5221e-08	-0.416797	0.000280608
TcCLB.510105.240	short chain 3-hydroxyacyl-CoA dehydrogenase, putative	-0.816857	1.12959e-25	-0.904445	1.39833e-31	-1.16451	6.54294e-51	-0.347653	7.54811e-05	-0.260064	0.00651918
TcCLB.510105.50	fibrillarin, putative	-0.914777	4.51341e-17	-0.932133	7.3828e-18	-1.30936	1.5996e-33	-0.39458	0.0017762	-0.377224	0.00432912
TcCLB.510127.79	actin 3, putative (fragment)	-0.46712	2.16995e-18	-0.800497	1.06345e-52	-1.0014	3.88841e-81	-0.534282	2.68449e-22	-0.200905	0.00146315
TcCLB.510271.20	dispersed gene family protein 1 (DGF-1, pseudogene), putative	-0.0535451	0.930238	0.492678	0.277663	-1.47211	0.00173286	-1.41856	0.00561254	-1.96478	6.91515e-05
TcCLB.510285.80	hypothetical protein, conserved	-0.665451	1.28951e-09	-0.712142	4.95994e-11	-1.07311	1.45079e-23	-0.407655	0.000863674	-0.360963	0.00535074
TcCLB.510311.170	hypothetical protein, conserved	-0.667753	4.67561e-15	-0.716647	2.66273e-17	-1.15947	8.11209e-41	-0.491716	3.30241e-07	-0.442822	1.10956e-05
TcCLB.510353.10	major vault protein, putative	-0.704263	1.0834e-20	-0.622762	1.4466e-16	-1.01126	1.52899e-41	-0.306997	0.000328058	-0.388498	5.37856e-06
TcCLB.510493.4	hypothetical protein, conserved (fragment)	-1.09472	0.0523374	-0.354426	0.55803	-1.27734	0.0225014	-0.182623	0.850345	-0.922915	0.197137
TcCLB.510507.20	3-ketoacyl-CoA thiolase, putative	-0.81331	6.90933e-43	-0.971902	8.39738e-61	-1.15415	1.44359e-83	-0.34084	2.59201e-07	-0.182248	0.0160456
TcCLB.510509.9	inositol 1,4,5-trisphosphate receptor, putative (fragment)	-0.419259	0.0158202	-0.0831722	0.691059	-1.14397	2.30972e-12	-0.724707	5.45648e-05	-1.06079	1.50772e-09
TcCLB.510531.109	dynein heavy chain, cytosolic, putative (fragment)	-0.609307	0.0156014	-0.259842	0.341992	-1.89789	8.43213e-14	-1.28858	3.79311e-06	-1.63804	2.97171e-09
TcCLB.510533.10	Cytoplasmic dynein 1 heavy chain (DYNC1H1), putative	-0.392385	7.07482e-05	-0.410175	2.3449e-05	-1.12037	4.613e-33	-0.727986	2.00312e-13	-0.710196	2.52155e-12
TcCLB.510535.20	hypothetical protein, conserved	-0.349234	0.000462343	-0.434667	6.67251e-06	-1.21592	1.25641e-38	-0.866685	8.11359e-19	-0.781251	1.03198e-14
TcCLB.510595.4	hypothetical protein, conserved	-0.619776	0.00701618	-0.759466	0.000644896	-1.52064	9.45015e-12	-0.900868	0.000312883	-0.761178	0.00448954
TcCLB.510609.20	hypothetical protein, conserved	-0.863139	2.26445e-17	-0.923511	6.69128e-20	-1.054	2.30764e-25	-0.190862	0.151019	-0.13049	0.395474
TcCLB.510747.60	cytochrome P450 reductase, putative	-0.599583	1.36412e-06	-0.465855	0.000185279	-1.04068	1.09119e-17	-0.4411	0.00156277	-0.574828	3.13509e-05
TcCLB.510755.120	RNA-binding protein, putative	-0.903812	2.22997e-18	-0.954036	1.52197e-20	-1.2385	1.80822e-33	-0.334691	0.0058121	-0.284467	0.0297193
TcCLB.510815.9	dispersed gene family protein 1 (DGF-1), putative	-0.228807	0.626265	-0.0646095	0.893449	-1.15331	0.00372955	-0.924502	0.0416236	-1.0887	0.0172395
TcCLB.510847.70	dispersed gene family protein 1 (DGF-1), putative	-0.330275	0.478199	-0.332202	0.460125	-1.32007	0.00130499	-0.989793	0.0364736	-0.987865	0.0468371
TcCLB.510877.30	hypothetical protein, conserved	-0.937969	2.48037e-06	-0.773355	0.000106654	-1.19956	4.44125e-10	-0.261588	0.316534	-0.426202	0.0830217
TcCLB.510879.180	hypothetical protein	-0.410289	0.00128546	-0.621748	3.39856e-07	-1.40197	9.17049e-31	-0.991684	1.13309e-14	-0.780225	8.27992e-09
TcCLB.510913.10	dispersed gene family protein 1 (DGF-1), putative (fragment)	-0.000536721	0.99888	-0.169215	0.585959	-1.41307	2.39703e-07	-1.41254	9.04934e-07	-1.24386	4.08074e-05
TcCLB.510955.20	hypothetical protein, conserved	-0.483132	1.24972e-06	-0.676439	3.96994e-12	-1.06099	1.63498e-26	-0.577855	1.1602e-07	-0.384548	0.0013458
TcCLB.511001.40	hypothetical protein	-0.777848	2.20589e-14	-0.851426	4.78699e-17	-1.0551	3.69922e-24	-0.277248	0.0327408	-0.20367	0.167138
TcCLB.511071.50	3-hydroxy-3-methylglutaryl-CoA synthase, putative	-0.929559	1.47201e-46	-0.955186	2.44874e-49	-1.09697	2.47872e-64	-0.167414	0.0365371	-0.141787	0.104246
TcCLB.511115.30	hypothetical protein, conserved	-0.689868	1.29837e-15	-0.844996	5.81045e-23	-1.09441	1.54977e-36	-0.404539	3.72012e-05	-0.249412	0.0246581
TcCLB.511125.9	dispersed gene family protein 1 (DGF-1), putative	-0.371849	0.570254	0.0143419	0.982507	-1.20059	0.0411863	-0.828737	0.254591	-1.21493	0.0769354
TcCLB.511171.10	dispersed gene family protein 1 (DGF-1), putative	-0.190134	0.797311	0.308979	0.638074	-1.35845	0.0291496	-1.16832	0.104275	-1.66743	0.0149288
TcCLB.511181.150	hypothetical protein, conserved	-0.613984	1.87641e-06	-0.670786	1.22872e-07	-1.08097	1.62354e-17	-0.466986	0.00136339	-0.410184	0.00836351
TcCLB.511211.120	receptor for activated C kinase 1, putative	-0.345206	0.000262598	-0.519184	9.95141e-09	-1.31647	1.26712e-50	-0.971267	1.35665e-26	-0.797289	3.10895e-17
TcCLB.511211.130	receptor for activated C kinase 1, putative	-0.206156	0.090838	-0.584228	5.81757e-08	-1.10454	8.78686e-26	-0.898381	2.66239e-16	-0.52031	1.30151e-05
TcCLB.511211.30	hypothetical protein	-0.478723	0.00114402	-0.949146	2.17776e-11	-1.03043	7.7718e-13	-0.551705	0.000709208	-0.0812819	0.753256
TcCLB.511217.120	peptidyl-prolyl cis-trans isomerase, putative	-0.770702	4.2085e-13	-0.991151	8.2225e-21	-1.03084	8.29042e-22	-0.260138	0.0540299	-0.0396898	0.847397
TcCLB.511217.209	hypothetical protein, conserved (fragment)	-0.84955	3.37132e-10	-0.795043	3.25362e-09	-1.01411	7.92432e-14	-0.164564	0.401964	-0.21907	0.2648
TcCLB.511303.34	Macro domain containing protein, putative	-0.530832	3.65146e-05	-0.761789	1.10117e-09	-1.32884	1.75273e-25	-0.798009	7.40847e-09	-0.567052	0.00014511
TcCLB.511363.4	hypothetical protein, conserved	-0.833711	3.4932e-24	-0.964873	2.14494e-32	-1.22512	5.64157e-51	-0.391406	1.90212e-05	-0.260244	0.0102628
TcCLB.511365.4	hypothetical protein, conserved (fragment)	-0.58035	0.0139263	-0.499217	0.0332922	-1.15945	4.95161e-07	-0.5791	0.0364939	-0.660233	0.0189786
TcCLB.511421.200	ARM-like helical domain-containing protein	-0.70518	1.50882e-23	-0.638548	1.03618e-19	-1.03591	1.36837e-48	-0.330734	3.66923e-05	-0.397366	7.77693e-07
TcCLB.511445.20	radial spoke protein 3, putative	-0.626516	4.6413e-11	-0.895448	9.77091e-22	-1.04822	5.60106e-29	-0.421707	6.15981e-05	-0.152775	0.26108
TcCLB.511529.210	hypothetical protein, conserved	-0.854694	1.48457e-21	-0.970368	9.85779e-28	-1.08706	2.51322e-34	-0.232371	0.0330641	-0.116697	0.38624
TcCLB.511537.69	hypothetical protein, conserved	-0.7323	1.03146e-11	-0.671122	4.09991e-10	-1.02215	2.64548e-22	-0.289848	0.0211699	-0.351026	0.00546358
TcCLB.511539.9	hypothetical protein, conserved	-0.733131	8.80076e-10	-0.684281	8.92886e-09	-1.15413	3.57338e-23	-0.421	0.00158045	-0.46985	0.000511065
TcCLB.511545.90	hypothetical protein	-0.430137	1.19805e-08	-0.723837	8.57022e-23	-1.19074	1.85546e-56	-0.760603	6.00386e-22	-0.466903	5.03189e-08
TcCLB.511559.50	hypothetical protein, conserved	-0.695572	4.60892e-16	-0.993868	7.33393e-32	-1.30364	1.64146e-52	-0.608072	4.47259e-11	-0.309776	0.0030654
TcCLB.511589.60	hypothetical protein, conserved	-0.598114	4.05878e-05	-0.908116	2.21018e-10	-1.14601	5.64575e-15	-0.547897	0.00120328	-0.237895	0.270447
TcCLB.511677.10	dispersed gene family protein 1 (DGF-1), putative	0.0953549	0.840988	-0.157306	0.720967	-1.09047	0.00402796	-1.18583	0.00332115	-0.933168	0.0370999
TcCLB.511681.20	histone H4, putative	-0.820716	2.75227e-22	-0.992543	1.93535e-32	-1.08792	1.42684e-38	-0.267208	0.00700759	-0.0953815	0.467723
TcCLB.511685.20	mucin TcSMUGS, putative	-0.690808	0.237054	-1.02113	0.059312	-2.22245	1.11416e-05	-1.53164	0.00717908	-1.20132	0.0545442
TcCLB.511691.39	hypothetical protein, conserved (fragment)	-0.801424	1.61751e-16	-0.900947	1.14685e-20	-1.00842	4.78337e-25	-0.206996	0.0997202	-0.107473	0.488951
TcCLB.511693.10	hypothetical protein	-0.448588	1.1381e-05	-0.522313	1.69672e-07	-1.42159	5.1255e-48	-0.973006	1.29555e-21	-0.899281	1.16239e-17
TcCLB.511729.60	MORN repeat-containing protein 1	-0.741056	1.07408e-16	-0.751685	2.61402e-17	-1.06926	1.36833e-33	-0.328201	0.00133973	-0.317572	0.0029244
TcCLB.511733.130	chaperonin HSP60, putative (fragment)	-0.602111	5.47792e-05	-0.774153	1.25603e-07	-1.12519	7.56563e-14	-0.52308	0.00279667	-0.351037	0.0793489
TcCLB.511749.9	hypothetical protein, conserved (fragment)	-0.498958	9.64438e-05	-0.258866	0.0555841	-1.1713	5.49602e-22	-0.672343	3.23261e-07	-0.912435	2.66977e-12
TcCLB.511751.14	hypothetical protein, conserved (fragment)	-0.650608	0.122307	-0.345716	0.442505	-1.82627	9.66422e-07	-1.17566	0.00511399	-1.48055	0.000388626
TcCLB.511867.209	dynein heavy chain, putative (fragment)	-0.699584	0.134741	-0.487843	0.311583	-1.97099	1.85533e-06	-1.27141	0.00646028	-1.48315	0.00163229
TcCLB.511869.9	dynein heavy chain, putative (fragment)	-0.722239	0.0576144	-0.383217	0.345503	-1.65822	1.36223e-06	-0.935979	0.018234	-1.275	0.00104674
TcCLB.511875.29	mucin-associated surface protein (MASP, pseudogene), putative	-0.546534	NA	-1.04078	0.253832	-1.80527	0.0497743	-1.25874	NA	-0.764489	NA
TcCLB.506213.120	ATP-dependent RNA helicase HEL67	-0.626472	0.0496674	0.127683	0.737042	-0.923863	0.00167559	-0.297391	0.458799	-1.05155	0.00113262
TcCLB.506409.130	Mucin-associated surface protein (MASP) (pseudogene)	0.0460461	0.958255	0.916813	0.140732	-0.760465	0.29641	-0.806511	0.340023	-1.67728	0.0208019
TcCLB.507477.10	dispersed gene family protein 1 (DGF-1), putative	0.355898	0.187976	0.492965	0.0490022	-0.687134	0.00931785	-1.04303	8.7806e-05	-1.1801	1.10956e-05
TcCLB.507507.49	hypothetical protein, conserved	-0.381367	0.316705	0.153264	0.702407	-0.883248	0.011462	-0.501882	0.256895	-1.03651	0.00713515
TcCLB.507805.30	hypothetical protein, conserved (pseudogene)	0.0349701	0.911726	0.436616	0.0476008	-0.61957	0.00746748	-0.65454	0.00875501	-1.05619	7.30749e-06
TcCLB.507827.10	dispersed gene family protein 1 (DGF-1), putative	-0.0629024	0.875788	0.32787	0.294871	-0.874744	0.00460522	-0.811842	0.0173751	-1.20261	0.000207385
TcCLB.507871.9	dispersed gene family protein 1 (DGF-1), putative	0.0304919	0.952812	0.205427	0.638022	-0.858815	0.030048	-0.889307	0.0406376	-1.06424	0.014459
TcCLB.508163.70	dispersed gene family protein 1 (DGF-1), putative	0.0682239	0.829965	0.320744	0.201926	-0.801962	0.00109558	-0.870186	0.000843156	-1.12271	1.23192e-05
TcCLB.508559.29	dispersed gene family protein 1 (DGF-1), putative	-0.0875002	0.861098	0.144062	0.748294	-0.909479	0.0180496	-0.821979	0.0583376	-1.05354	0.0138681
TcCLB.508831.250	dispersed gene family protein 1 (DGF-1), putative	0.265832	0.455424	0.601656	0.0445635	-0.583983	0.0806959	-0.849815	0.0133682	-1.18564	0.000329435
TcCLB.508837.34	dispersed gene family protein 1 (DGF-1), putative (fragment)	-0.377328	0.302957	0.263506	0.463871	-0.782601	0.0195314	-0.405274	0.351678	-1.04611	0.00373076
TcCLB.508903.90	dispersed gene family protein 1 (DGF-1, pseudogene), putative	-0.132005	0.715107	0.159185	0.638422	-0.895668	0.00278909	-0.763663	0.0231048	-1.05485	0.00115054
TcCLB.509013.19	calpain-like cysteine peptidase, putative (fragment)	0.251029	0.49329	0.733459	0.0144455	-0.403309	0.227158	-0.654338	0.0594861	-1.13677	0.000414802
TcCLB.509887.19	dispersed gene family protein 1 (DGF-1), putative	-0.294369	0.583934	0.356543	0.461055	-0.810446	0.0882102	-0.516077	0.39296	-1.16699	0.0227504
TcCLB.509891.70	SPRY domain/HECT-domain (ubiquitin-transferase), putative	-0.275212	0.505438	0.282631	0.476597	-0.833565	0.0130027	-0.558353	0.165295	-1.1162	0.00221075
TcCLB.509919.9	dispersed gene family protein 1 (DGF-1), putative (fragment)	-0.280296	0.508522	0.2092	0.611162	-0.898586	0.0169126	-0.618291	0.176613	-1.10779	0.00704881
TcCLB.510607.29	dispersed gene family protein 1 (DGF-1), putative (fragment)	-0.100906	0.820623	0.380675	0.288643	-0.752735	0.0316457	-0.651829	0.10555	-1.13341	0.00213798
TcCLB.510773.9	Thioredoxin-like/Protein of unknown function (DUF3638)/Protein of unknown function (DUF3645), putative	-0.214681	0.506192	0.547061	0.0411355	-0.845451	0.00147327	-0.63077	0.0381301	-1.39251	3.74476e-07
TcCLB.510855.4	hypothetical protein, conserved	-0.0971179	0.685339	0.300761	0.121213	-0.820905	1.91706e-05	-0.723787	0.000516879	-1.12167	1.99101e-08
TcCLB.511371.10	retrotransposon hot spot (RHS) protein, putative	0.330037	0.645205	0.480091	0.462447	-1.03942	0.120816	-1.36946	0.0527536	-1.51951	0.035213
TcCLB.511435.49	phosphatidylinositol 3-kinase, putative	-0.275977	0.462327	0.283282	0.415521	-0.930909	0.00496174	-0.654932	0.0951977	-1.21419	0.000562279
TcCLB.511443.10	calpain-like cysteine peptidase, putative, frameshift	0.0583348	0.91724	0.597034	0.152775	-0.63706	0.114193	-0.695394	0.124094	-1.23409	0.00339138
TcCLB.511797.220	dispersed gene family protein 1 (DGF-1), putative	-0.0881803	0.83068	0.396993	0.218204	-0.975835	0.00277074	-0.887655	0.0138812	-1.37283	5.4165e-05
TcCLB.506129.80	retrotransposon hot spot protein (RHS, pseudogene), putative	0.635599	0.312233	-0.55844	0.41245	-1.05346	0.111122	-1.68906	0.010827	-0.495019	0.617366
TcCLB.506357.50	alcohol dehydrogenase, putative	0.403276	0.000125871	-0.233768	0.0335438	-0.777435	3.63898e-15	-1.18071	1.34061e-32	-0.543667	5.66464e-07
TcCLB.509845.9	dispersed gene family protein 1 (DGF-1), putative	0.453228	0.201259	-0.116209	0.78165	-0.623031	0.0828264	-1.07626	0.00252089	-0.506823	0.265858
